1  
2  
3  
4  
5  
6  
7  
8  
9  
10  
11  
12  
13  
14  
15  
16  
17  
18  
19  
20  
21  
22  
23  
24  
25  
26

## Multimodal neuroimaging data from a 5-week heart rate variability biofeedback randomized clinical trial

Hyun Joo Yoo<sup>1</sup>, Kaoru Nashiro<sup>1</sup>, Jungwon Min<sup>1</sup>, Christine Cho<sup>1</sup>, Noah Mercer<sup>1</sup>, Shelby L. Bachman<sup>1</sup>, Padideh Nasser<sup>1</sup>, Shubir Dutt<sup>1</sup>, Shai Porat<sup>1</sup>, Paul Choi<sup>1</sup>, Yong Zhang<sup>2</sup>, Vardui Grigoryan<sup>3</sup>, Tiantian Feng<sup>1</sup>, Julian F. Thayer<sup>4</sup>, Paul Lehrer<sup>5</sup>, Catie Chang<sup>6</sup>, Jeffrey A. Stanley<sup>7</sup>, Vasilis Z. Marmarelis<sup>1</sup>, Shrikanth Narayanan<sup>1</sup>, Daniel A. Nation<sup>4</sup>, Jessica Wisnowski<sup>1</sup>, and Mara Mather<sup>1\*</sup>

<sup>1</sup>University of Southern California

<sup>2</sup>University of Groningen

<sup>3</sup>University of California, Los Angeles

<sup>4</sup>University of California, Irvine

<sup>5</sup>Rutgers University

<sup>6</sup>Vanderbilt University

<sup>7</sup>Wayne State University School of Medicine

corresponding author(s): Mara Mather (mara.mather@usc.edu)

## 27 **Abstract**

28 We present data from the Heart Rate Variability and Emotion Regulation (HRV-ER) randomized  
29 clinical trial testing effects of HRV biofeedback. Younger (N = 121, ages 18-31, 61 female) and  
30 older (N = 72, ages 55-80, 45 female) participants completed baseline magnetic resonance  
31 imaging (MRI) including T<sub>1</sub>-weighted, functional MRI (fMRI), pulsed continuous arterial spin  
32 labeling (PCASL), and proton magnetic resonance spectroscopy (<sup>1</sup>H MRS). They also completed  
33 an emotion regulation task during fMRI. During fMRI scans, physiological measures (blood  
34 pressure, pulse, respiration, and end-tidal CO<sub>2</sub>) were continuously acquired. Participants were  
35 randomized to either increase heart rate oscillations or decrease heart rate oscillations during  
36 daily sessions. After 5 weeks of HRV biofeedback, they repeated the baseline measurements  
37 in addition to a few new measures (ultimatum game fMRI, training mimicking during blood  
38 oxygen level dependent (BOLD) and PCASL fMRI). Participants also wore a wristband sensor to  
39 estimate sleep time. Psychological assessment comprised three cognitive tests as well as ten  
40 questionnaires related to emotional well-being. Data is publicly available via the OpenNeuro  
41 data sharing platform.

## 42 **Background & Summary**

43 Heart rate variability (HRV) is one of the most consistent correlates of psychological and  
44 emotional well-being and stress<sup>1-3</sup>. However, it is not just random variation in the interval  
45 between heartbeats that is associated with well-being. In healthy resting people, heart rate is  
46 tonically suppressed by signals transmitted via the vagus nerve. This suppression of heart rate  
47 is stronger when exhaling than when inhaling<sup>4</sup>, and it is “vagal HRV” or the high frequency  
48 oscillations in heart rate in response to breathing that are most strongly associated with  
49 positive well-being (or low negative affect or stress). Spending time every day breathing at a  
50 pace of around 10 seconds per breath (a pace that induces resonance with the baroreflex and  
51 so induces high oscillations in heart rate) while getting biofeedback on heart rate oscillatory  
52 activity can enhance well-being<sup>5,6</sup>. This suggests that heart rate oscillatory activity serves as  
53 more than a readout of the integrity of the brain’s autonomic regulatory systems. Short bouts  
54 of high heart rate oscillations may stimulate these regulatory systems, enhancing their  
55 function<sup>7</sup>. To test this hypothesis, in a randomized clinical trial (ClinicalTrials.gov  
56 NCT03458910), we scanned younger and older participants while at rest and while doing an  
57 emotion regulation task both before and after five weeks of daily practice sessions in which  
58 they received heart rate variability biofeedback to either increase or decrease heart rate  
59 oscillations.

60 Initial studies using heart rate variability biofeedback yielded promising results and there has  
61 been a significant growth in interest in this intervention<sup>5,6</sup>. Compared with most prior HRV-  
62 biofeedback studies, our study has a larger N and a more extensive set of outcome measures.  
63 It is also unique among HRV-biofeedback studies in having all of the following features:  
64 functional and structural brain outcome measures, a well-matched active comparison group,  
65 inclusion of two age groups, and heart rate data available from each practice session. Thus,  
66 these Heart Rate Variability and Emotion Regulation (HRV-ER) clinical trial data should be a  
67 rich source for a variety of secondary analyses, including those investigating individual-  
68 difference factors that affect responses to HRV-biofeedback, examination of age differences  
69 in response to the intervention, and specific patterns of brain changes in response to the  
70 intervention. Furthermore, the baseline pre-intervention data could be relevant for potential  
71 secondary analyses unrelated to heart rate biofeedback. For instance, the larger N than seen  
72 in most fMRI emotion regulation studies allows for individual difference comparisons,  
73 especially given all the additional physiological data collected from each participant. In  
74 addition, this study includes data not typically available in public datasets, such as PCASL, a  
75 turbo spin echo (TSE) structural sequence targeting the locus coeruleus, and biochemical  
76 measurements using proton magnetic resonance spectroscopy (<sup>1</sup>H MRS), allowing for unique  
77 secondary analyses not previously feasible.

## 78 **Methods**

### 79 **Power Considerations for sample size**

80 No prior studies had examined effects of these interventions on brain function so we were  
81 unable to estimate effect sizes based on prior neuroimaging data. We elected to power our  
82 study to detect medium or larger effect sizes. Our main planned statistical comparisons were  
83 repeated-measures ANOVAs with within-between interactions. For these, a total sample size

84 of 46 would give 90% power to detect moderate effect sizes of  $f = .25$  with  $\alpha = .05$ , given an  
85 assumed correlation among the repeated measures of .5 (1). We also planned to examine  
86 within-subject change within each of the conditions. A sample size of 44 in each group would  
87 give 90% power to detect within-group change effect sizes of  $d = .5$  in a two-tailed t-test with  
88  $\alpha = .05$  (1). Thus, we aimed for an  $N = 100$  completion rate across the two groups for each  
89 age group to be able to accommodate potential exclusions for movement during imaging or  
90 other data quality issues.

91

## 92 **Participants**

93 We recruited 121 younger participants aged between 18 and 35 years and 72 older  
94 participants aged between 55 and 80 years via the USC Healthy Minds community subject  
95 pool, a USC online bulletin board, Facebook and flyers between February 2018 and March  
96 2020 (see Fig. 1 for drop-out rates per condition; note that older adult enrollment was cut  
97 short by the COVID pandemic). Participants provided informed consent approved by the  
98 University of Southern California (USC) Institutional Review Board. Participants were recruited  
99 in waves of approximately 20 participants at a time, each of whom was assigned to a small  
100 group of 3-6 people. Groups met for weekly lab visits at the same time and day each week.  
101 After group assignments of a wave were complete, we assigned each group to one of two  
102 conditions involving daily biofeedback that aimed to increase heart rate oscillations (Osc+  
103 condition) or decrease heart rate oscillations (Osc- condition). We used blocked randomization  
104 across small groups to maintain balanced numbers of each condition. We did this by  
105 determining how many groups were assigned to a condition; for example, if 2 out of 5 groups  
106 in a previous wave were assigned the Osc+ condition, then 3 out of 5 groups were assigned  
107 that condition in the next wave. Then we randomly allocated those conditions to groups. One  
108 research staff member who was blinded to participants and small group assignment generated  
109 the random numbers and assigned the conditions to each small group. The study utilized a  
110 single-blinded design; the consent document did not mention that there were two conditions  
111 and participants in both conditions were told that we were interested in how training to  
112 control heart rate might influence emotional health and the functions of brain regions involved  
113 in emotion regulation. Upon completing the study, participants were paid for their  
114 participation and received bonus payments based on their individual and group performances  
115 (incentives for training were the same across conditions; see Supplementary Information for  
116 more details). Prospective participants were screened and excluded for major medical,  
117 neurological, or psychiatric illnesses. We excluded people who had a disorder that would  
118 impede performing the HRV biofeedback procedures (e.g., coronary artery disease, angina,  
119 cardiac pacemaker), who currently were training using a relaxation, biofeedback or breathing  
120 practice, or were on any psychoactive drugs other than antidepressants or anti-anxiety  
121 medications. We included people who were taking antidepressant or anti-anxiety medication  
122 and/or attending psychotherapy only if the treatment had been ongoing and unchanged for  
123 at least three months and no changes were anticipated. Gender, education, age, and race did  
124 not differ significantly in the two conditions.

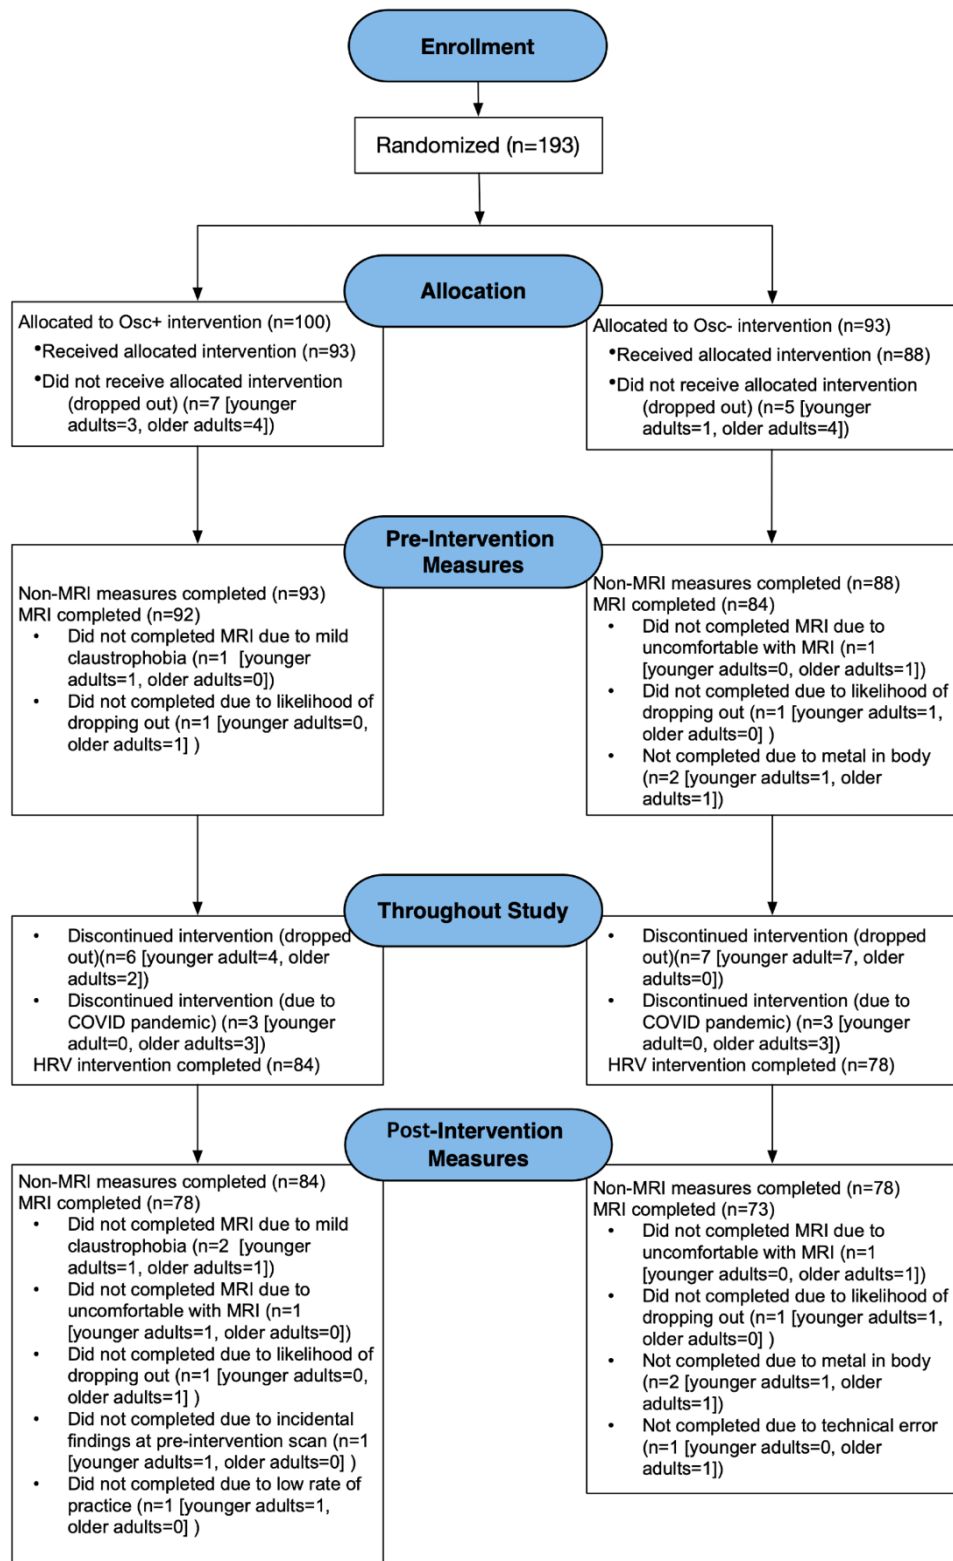

125 **Fig. 1. CONSORT flow diagram showing participant flow through each stage of the**  
 126 **randomized controlled trial.**

## 7- WEEK STUDY SCHEDULE

### *Lab visits and biofeedback training*

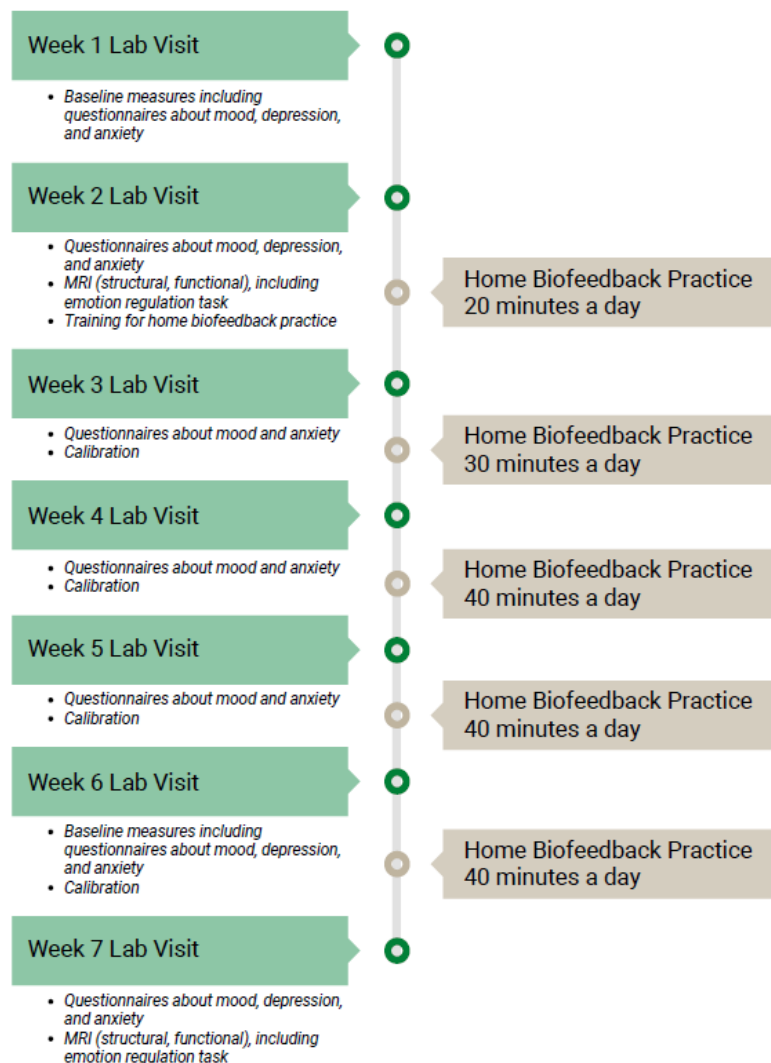

127 **Fig. 2. Study 7-week schedule.**

128

#### 129 **Overview of 7-week protocol schedule**

130 The study protocol involved seven weekly lab visits and five weeks of home biofeedback  
131 training (Fig. 2). Each lab visit began with questionnaires assessing mood and anxiety. The first  
132 lab visit involved non-MR baseline measurements, including several questionnaires. The  
133 second lab visit involved the baseline MR session, followed by the first biofeedback calibration  
134 and training session (see below for details). The weekly lab visits (except for weeks with MR  
135 sessions) were run in small groups in which participants shared their experiences and tips  
136 about biofeedback training with other participants from the same condition, while 1-2  
137 researchers facilitated the discussion. Outside the lab, participants used a customized social  
138 app to communicate with other group members and researchers about their progress on daily  
139 biofeedback training. The Week 6 lab visit repeated the assessments from the first lab visit.  
140 The final (7th) lab visit repeated the baseline MR session scans in the same order. Additional

141 training-session scans were collected at the end of the scan protocol. Finally, after the scan,  
142 participants completed a post-study questionnaire. Table 1 provides detailed information  
143 about the measurement at each time point.

144 **Table 1. Measurement at each time point.**

| Category        | Data type                         | Week1 | Week2 | Week3 | Week4 | Week5 | Week6 | Week7 | Measurement                                                     |
|-----------------|-----------------------------------|-------|-------|-------|-------|-------|-------|-------|-----------------------------------------------------------------|
| Demographics    | Demographics                      | *     |       |       |       |       |       |       | •Self-report                                                    |
| Questionnaire   | Emotion-weekly (POMS, SAI)        | *     | *     | *     | *     | *     | *     | *     | •Self-report                                                    |
|                 | Emotion-4 times (CESD, TAI)       | *     | *     |       |       |       | *     | *     | •Self-report                                                    |
|                 | Altruism                          |       | *     |       |       |       |       |       | •Self-report                                                    |
|                 | others-pre/post (FFMQ)            | *     |       |       |       |       | *     |       | •Self-report                                                    |
| Cognitive task  | NIH toolbox: Cognition            | *     |       |       |       |       | *     |       | •score                                                          |
|                 | SART                              | *     |       |       |       |       | *     |       | •score<br>•response time                                        |
|                 | Picture memory task               |       |       |       | *     | *     |       |       | •encoding (week 4)<br>•recognition (week 5)<br>•recall (week 5) |
| Heart rate data | calibration                       |       | *     | *     | *     | *     | *     | *     | •Inter-beat-interval data from pulse                            |
|                 | Home training                     |       | *     | *     | *     | *     | *     |       | •inter-beat-interval data from pulse                            |
| Stress task     | Physiological data                | *     |       |       |       |       | *     |       | •ECG, respiration, GSR, continuous blood pressure               |
|                 | Behavioral data                   | *     |       |       |       |       | *     |       | •score                                                          |
| MR Imaging      | Functional-resting                |       | *     |       |       |       |       | *     | •brain imaging data<br>•physiological data                      |
|                 | Functional-resting ASL            |       | *     |       |       |       |       | *     | •brain imaging data<br>•physiological data                      |
|                 | Functional-Emotion regulation     |       | *     |       |       |       |       | *     | •brain imaging data<br>•physiological data<br>•event data       |
|                 | Anatomical-T <sub>1</sub>         |       | *     |       |       |       |       | *     | •brain imaging data                                             |
|                 | <sup>1</sup> H MRS                |       | *     |       |       |       |       | *     | •brain biochemistry data                                        |
|                 | Anatomical-TSE                    |       | *     |       |       |       |       | *     | •brain imaging data (locus coeruleus)                           |
|                 | Functional-UG                     |       |       |       |       |       |       | *     | •brain imaging data<br>•physiological data<br>•event data       |
|                 | Functional-training mimicking     |       |       |       |       |       |       | *     | •brain imaging data<br>•physiological data<br>•event data       |
|                 | Functional-training mimicking ASL |       |       |       |       |       |       | *     | •brain imaging data<br>•physiological data<br>•event data       |

145

146 Biofeedback training

147 *Osc+ group*

148 Participants wore an ear sensor to measure their pulse. They viewed real-time heart rate  
149 biofeedback while breathing in through the nose and out through the mouth in synchrony with  
150 a visual pacer. The software<sup>8</sup> provided a summary ‘coherence’ score for participants calculated  
151 as peak power/(total power – peak power). Peak power was determined by finding the highest  
152 peak within the range of 0.04 – 0.26 Hz and calculating the integral of the window 0.015 Hz  
153 above and below this highest peak. Total power was computed for the 0.0033 – 0.4 Hz range.

154 During the second lab visit, we introduced participants to the device and had them complete  
155 five minutes of paced breathing at 9 s, 10 s, 11 s, 12 s, and 13 s per breath, which approximately  
156 corresponds with 6.5, 6, 5.5, 5 and 4.5 breaths/min in Lehrer et al.<sup>9</sup> Next, we computed various  
157 aspects of the oscillatory dynamics for each breathing pace using Kubios HRV Premium 3.1  
158 software<sup>10</sup> and assessed which breathing pace had the most of the following characteristics:  
159 highest LF power, the highest maximum LF amplitude peak on the spectral graph, highest  
160 peak-to-trough amplitude, cleanest and highest-amplitude LF peak, highest coherence score  
161 and highest root mean squared successive differences (RMSSD). Participants were then  
162 instructed to train at home with the pacer set to the frequency that appeared to best  
163 approximate their resonance frequency<sup>9</sup> and to maximize their coherence scores.

164 During the third visit, they were asked to complete three 5-min paced breathing segments:  
165 the best condition from the last week’s visit, half a breath per minute faster, and half a breath  
166 slower than the best condition. They were then instructed to train the following week at the  
167 pace that appeared most likely to be a resonance frequency based on the characteristics listed  
168 above. In subsequent weekly visits, during 5-min training segments, they were asked to try out  
169 abdominal breathing and inhaling through the nose/exhaling through pursed lips as well as  
170 other strategies of their choice.

171 *Osc- group*

172 This condition was designed to be as similar as possible to the Osc+ condition, but with the  
173 opposing goal (to reduce heart rate oscillations). The same biofeedback ear sensor device was  
174 used in this condition and participants were asked to practice for the same amount of time.  
175 However, we created custom software to display a different set of feedback to the Osc-  
176 participants<sup>11</sup>. During each Osc- training session, a ‘calmness’ score was provided as feedback  
177 to the participants instead of the coherence score. The calmness score was calculated by  
178 multiplying the coherence score that would have been displayed in the Osc+ condition by -1  
179 and adding 10 (an ‘anti-coherence’ score). The net result was that participants got more  
180 positive feedback (higher calmness scores) when their heart rate oscillatory activity in the 0.04  
181 – 0.26 Hz range was low. The software also included a minor point penalty when heart rate  
182 was the lowest it had been in the most recent 15 s. Specifically, every 5 s, a local maximum IBI  
183 was set based on the maximum IBI from the past 15 s. If, at that point, the participant’s current  
184 IBI was longer than this local maximum, the calmness score displayed for the next 5 s was the  
185 anti-coherence score - 2. Naturally, most of the time, current IBI was lower than the local  
186 maximum, and in those cases, the calmness score was the anti-coherence score +1. Thus, there



187 was a penalty in their calmness score for moments when their heart rate was slower than it  
188 had been in any of the past 15 s.

189 During the initial calibration session at the end of the second lab visit, each participant was  
190 introduced to the device and feedback and was asked to come up with five strategies to lower  
191 heart rate and heart rate oscillations. The participant was asked to wear the ear sensor and  
192 view real-time heart rate biofeedback while they tried each strategy for five minutes. We  
193 analyzed the data in Kubios and identified the best strategy as the one with the most of the  
194 following characteristics: lowest LF power, the minimum LF-amplitude peak on the spectral  
195 graph, lowest peak trough amplitude, multiple and lowest-amplitude LF-peak, highest  
196 calmness score and lowest RMSSD. Participants were then instructed to use this strategy to  
197 try to maximize their calmness scores in their home training sessions.

198 On the third visit, they were asked to select three strategies and try each out in a 5-min session.  
199 The strategy identified as best (based on the same characteristics used in the initial calibration  
200 session) was selected as the one to focus on during home training. In subsequent weekly visits,  
201 during 5-min training segments, they were again asked to try out strategies of their choice.

## 202 Heart rate data from lab calibration and home training

203 During lab calibration, pulse was measured using HeartMath emWave pro software with an  
204 infrared pulse plethysmograph (PPG) ear sensor while participants sat in a chair with knees at  
205 a 90 degrees angle and both feet flat on the floor. The pulse wave was recorded with a  
206 sampling rate of 370 Hz. Interbeat interval (IBI) data was extracted after eliminating ectopic  
207 beats and other artifactual signals through a built-in process in emWave pro. On each home  
208 training session, pulse was measured using the same devices and software used for calibration  
209 sessions. An IBI data file was saved on a study-provided laptop and transferred to the lab  
210 server after completing each session.

## 211 **Questionnaires**

### 212 Emotion questionnaires

213 During each lab visit, participants completed the profile of mood states (POMS)<sup>12</sup> and the State  
214 Anxiety Inventory (SAI)<sup>13</sup>. We used the 40-item version of POMS. Participants reported how  
215 much each item reflected how they felt at the moment using a scale from 1 (not at all) to 5  
216 (extremely). Total mood disturbance was calculated by subtracting positive-item totals from  
217 negative-item totals. A constant value (i.e. 100) was added to the total mood disturbance to  
218 eliminate negative scores. The SAI measures state anxiety using 20 statements. Participants  
219 indicated how they felt at the moment on a scale from 1 (not at all) to 4 (very much so). In  
220 Weeks 1, 2, 6 and 7, we also administered the Trait Anxiety Inventory (TAI)<sup>13</sup> and the Center  
221 for Epidemiological Studies Depression Scale (CES-D) in Weeks 1, 2, 6 and 7<sup>14</sup>. The TAI  
222 measures trait anxiety using 20 statements, which participants rated on a 4-point scale from  
223 1 (not at all) to 4 (very much so). The CES-D consists of 20 statements, which participants rated  
224 on a 4-point scale from 0 (rarely) to 3 (most or all of the time). At Week 1 and Week 6 lab visits,  
225 participants completed six additional emotion questionnaires. We assessed trait mindfulness  
226 using the 20-item version of the Five Facet Mindfulness Questionnaire (FFMQ)<sup>15</sup>. Participants  
227 rated each item using a scale from 1 (never) to 5 (very often/always true). We also

228 administered the Smith Relaxation States Inventory 3 (SRSI3)<sup>16</sup> to assess various aspects of  
229 stress, relaxation, meditation, and mindfulness. Participants completed state and disposition  
230 versions of the SRSI3 each consisting of 38 items. The state version asks how you “feel right  
231 now” on a 6-point scale from 1 (not at all) to 6 (maximum). The disposition version asks how  
232 often you experience relaxation states and stress states. We slightly modified the  
233 disposition version and asked how often each item has been experienced “in the past month”  
234 on a 6-point scale from 1 (rarely or never, less than once a month) to 6 (a lot, more than once  
235 a day). We calculated SRSI3 scores based on the Relaxation/Meditation/Mindfulness (RMM)  
236 Tracker/SRSI3 Manual v9.9.2020, which includes 34 items for scoring<sup>17</sup>. We measured the  
237 extent and severity of fatigue using the 11-item Chalder Fatigue Scale (CFQ 11)<sup>18</sup> on a 4-point  
238 scale from 0 (less than usual) to 3 (much more than usual) or 0 (better than usual) to 3 (much  
239 worse than usual). We also administered the 10-item Emotion Regulation Questionnaire  
240 (ERQ)<sup>19</sup>, which is designed to measure tendency to regulate emotions in two ways (cognitive  
241 reappraisal and expressive suppression) on a 7-point scale from 1 (strongly disagree) to 7  
242 (strongly agree). Participants also completed a self-efficacy version of the 10-item ERQ, which  
243 asks how “capable” they are of regulating their emotions on the same 7-point scale. In addition,  
244 perceived stress was measured using the NIH Toolbox Perceived Stress Survey<sup>20</sup>, a 10-item  
245 version of the Perceived Stress Scale<sup>21</sup>. Participants rated the frequency of stressful  
246 experiences and the extent to which they felt strained or overloaded during the past month  
247 (e.g., How often have you felt nervous and “stressed”? How often have you felt difficulties  
248 were piling up so high that you could not overcome them?) on a five-point scale, ranging from  
249 Never (1) to Very Often (5); higher scores correspond to greater perceived stress. Score on the  
250 perceived stress scale has been calculated as the mean score. All the rest are calculated as  
251 sum scores.

252

### 253 Altruism questionnaire

254 Participants completed the Altruism scale questionnaire<sup>22</sup> during their lab visits on the second  
255 week of intervention. Altruism scale questionnaire is a self-report scale with 20 items each  
256 describing an altruistic behavior (e.g., “I have done volunteer work for a charity” and “I have  
257 delayed an elevator and held the door open for a stranger). Participants were instructed to  
258 rate the frequency of engaging in these behaviors on a 5-point scale (1 = never; 2 = once,  
259 3 = more than once; 4 = often; 5 = very often). Higher scores in this scale correspond with  
260 higher altruistic tendencies.

### 261 Demographics and post-study questionnaire

262 The week-1 visit, participants completed questionnaires including basic demographics, clinical  
263 history including medications.

264 After the Week-7 post-intervention scan, participants completed a questionnaire surveying  
265 their experience during the study. They provided self-ratings of difficulty of daily heart rate  
266 biofeedback training, level of effort to complete the training, expectations of the training  
267 impact on well-being, and likelihood of continuing the training after the study’s conclusion.

## 268 **Stress task**

269 During the week 1 and week 6 lab visits, participants completed a task designed to assess  
270 reactivity to and recovery from acute stress. The task consisted of several phases: a 4-minute  
271 baseline resting phase, a stress phase, and a 4-minute recovery resting phase. Younger  
272 participants completed two computerized tasks during the stress phase: a Paced Auditory  
273 Serial Addition Task (PASAT) and a modified Stroop color-word matching task. Seven older  
274 participants completed a pilot version of the stress phase which included both the PASAT and  
275 Stroop tasks. But the rest of older participants completed only the Stroop task. Descriptions  
276 of the PASAT and Stroop tasks are provided below. To enhance the socially evaluative nature  
277 of the tasks, participants were told that their performance would be evaluated by the  
278 experimenter and compared with that of other participants. In addition, auditory feedback  
279 was provided during each task, with a buzzer sound played for incorrect or missed responses  
280 and a bell sound played for correct responses<sup>23</sup>. During the baseline and recovery resting  
281 phases, participants sat with their feet resting flat on the ground, their hands resting in a prone  
282 position on a flat table, and their eyes open.

283 Physiological signals were recorded during all phases of the stress task using a BIOPAC MP160  
284 system at a sampling frequency of 2 KHz. Electrocardiogram (ECG) and respiration signals were  
285 sent to the MP160 with a BioNomadix wireless transmitter. ECG signals were measured using  
286 a Lead II configuration and disposable, pre-gelled Ag/AgCl electrodes (EL501). Respiration  
287 signals were assessed with the BIOPAC Respiratory Effort Transducer, which involved a belt  
288 being placed around the lower rib cage to measure changes in chest circumference. Blood  
289 pressure signals were measured from the non-dominant arm with a BIOPAC noninvasive blood  
290 pressure monitoring system (NIBP100D). For electrodermal activity recordings, disposable,  
291 pre-gelled Ag/AgCl electrodes (EL507) were attached to the palmar side of the medial  
292 phalange of the fourth and fifth fingers of each participant's non-dominant hand (as the index  
293 and middle fingers were used for continuous blood pressure recordings); leads were  
294 connected to a BIOPAC GSR100C module. Raw physiological signals were split into segments  
295 corresponding to the phases of the stress task.

### 296 Paced Auditory Serial Addition Task (PASAT)

297 During the PASAT, participants were shown a series of digits. They were instructed to add  
298 each digit to the digit shown previously and enter the sum using the keyboard<sup>24</sup>. The sum  
299 always ranged between 1-20. The PASAT consisted of 30 trials, and participants completed 4  
300 practice trials prior to beginning the task.

### 301 Modified Stroop Task

302 On each trial of the modified Stroop color-word matching task, participants first saw one of  
303 two instructions: "color" or "meaning," followed by a color word (RED, GREEN, or BLUE)  
304 presented in one of three colors incongruent with its meaning (either red, green or blue)<sup>25</sup>.  
305 Participants were instructed to press a key corresponding to either the color or meaning of  
306 the word stimulus, depending on the instruction shown immediately before the word. The  
307 task consisted of 20 trials, and participants completed 4 practice trials before beginning the  
308 task.

## 309 **Cognitive tasks**

### 310 The National Institutes of Health Toolbox Cognitive Battery

311 The National Institutes of Health (NIH) Toolbox Cognitive Battery is a component of the NIH  
312 Toolbox for Assessment of Neurological and Behavioral Function ([www.nihtoolbox.org](http://www.nihtoolbox.org);<sup>26,27</sup>)  
313 that comprises extensively validated computer-administered cognitive tests for use across  
314 childhood and adolescence, early adulthood, and old age. We administered the NIH-Toolbox  
315 cognitive battery using an iPad app on a 9.7 inch iPad Air 2. The Flanker Test, the List Sorting  
316 Working Memory (LSWM) Test, and the Pattern Comparison Processing Speed (PCPS) Test  
317 were administered to evaluate attention and executive function, working memory, and  
318 processing speed, respectively.

319 In addition to raw scores and/or reaction time, the NIH-toolbox cognitive battery generates  
320 computed scores and three types of standard scores for each subtest: uncorrected standard  
321 scores, age-corrected standard scores, and fully adjusted scores that account for age,  
322 education, gender, and race/ethnicity.

#### 323 *The Flanker inhibitory control and attention test*

324 The Flanker test is a version of the Eriksen flanker task derived from the Attention Network  
325 Test<sup>28</sup>. On each trial, a central directional target (arrows for ages 8 and older) is flanked by  
326 similar stimuli on the left and right. The participant chooses the direction of the central  
327 stimulus. On 12 congruent trials, the flankers face the same direction as the target. On 8  
328 incongruent trials, they face the opposite direction. A scoring algorithm integrates accuracy  
329 and reaction time, a measure more relevant to adult performance on this task, yielding  
330 computed scores from 0 to 10. There are 20 trials for ages 8 and older, and the test duration  
331 is about 4 min. Score is based on an algorithm derived from both accuracy and reaction time  
332 if the former is >80%. If less than 80%, score is accuracy. The test takes approximately  
333 3 minutes to administer.

#### 334 *The List Sorting Working Memory Test*

335 This task is an adaptation of Mungas' List Sorting task from the Spanish and English  
336 Neuropsychological Assessment Scales<sup>29,30</sup>. In this task, a list of stimuli is presented both  
337 visually (picture) and auditorily (recording of a one-word description of the stimulus) on a  
338 computer monitor, one at a time at a rate of 2 sec per stimulus, and participants are required  
339 to repeat all the stimuli back to the examiner in order of increasing real-world size, from  
340 smallest to largest. In the first phase of the test (i.e., the 1-List phase), participants are first  
341 shown a list with two items drawn from a single category (i.e., food). If participants are correct  
342 on this 2-item list, the number of items in the list presented on the next trial increases by one  
343 item, up to a total of seven items per list (i.e., list length ranges from a 2-item list to a 7-item  
344 list, for a total of six levels of list length). If participants err on a trial at a given list length, they  
345 receive another trial with the same number of items in the list; if they err on that trial, this  
346 phase of the test is discontinued. Following the 1-list phase, all participants proceed to the  
347 second phase of the test (the 2-list phase), in which they see lists of items drawn from two  
348 different categories (i.e., food and animals). Participants are instructed to reorder and repeat  
349 the stimuli first from one category, then the other, in order of size within each category. Lists

350 in the 2-list phase start with a 2-item list and increase in number of items in the same way as  
351 in the 1-list phase. For both phases, for each list length, participants receive a score of 2 points  
352 if they are correct on the first trial. A second trial at a given list length is only administered  
353 when participants fail the first trial. Participants receive a score of 1 point only for a given list  
354 length if they fail the first trial at that list length but pass the second trial. Test scores consist  
355 of combined total trials correct on the 1-list and 2-list phases of the task. The test takes  
356 approximately 7 minutes to administer.

### 357 *The Pattern Comparison Processing Speed Test*

358 The Pattern Comparison Processing Speed Test is modeled after Salthouse's Pattern  
359 Comparison Task<sup>31</sup>. This test requires participants to identify whether two visual patterns are  
360 the "same" or "not the same" (responses were made by pressing a "yes" or "no" button).  
361 Patterns are either identical or vary on one of three dimensions: color, adding/taking  
362 something away, or one versus many. Scores reflect the number of correct items (of a possible  
363 130) completed in 90 s. The test takes approximately 3 minutes to administer.

### 364 Sustained Attention to Response Task (SART)

365 The SART<sup>32</sup> was administered during Week 1 and Week 6 lab visits. During the task,  
366 participants were presented with a random series of single-digit numbers, ranging from 1 to  
367 9. Participants were instructed to press the spacebar as soon as they saw each number other  
368 than 3. The task consisted of 225 trials where a single digit was presented for 250 ms with a  
369 900-ms-lasting mask image between trials. The task took about 6 minutes and was based on  
370 the web-based Inquisit SART task developed by Millisecond Software.

### 371 Picture memory tasks

372 The emotional memory task was administered at the Week 4 and Week 5 lab visits. Seventy-  
373 two stimuli were selected from The Nencki Affective Picture System (NAPS)<sup>33</sup>, a database of  
374 realistic photographs that aim to induce positive, negative, or neutral emotional states. Stimuli  
375 were first counterbalanced by valence (24 each of positive, negative, and neutral); then two  
376 sets of 36 stimuli were created and counterbalanced by valence in each set (12 each of positive,  
377 negative, and neutral). Participants completed the task on the Qualtrics Survey platform.

378 At the Week 4 visit, one of the two sets of 36 stimuli were shown to participants by random  
379 assignment. After viewing each image, participants rated on a 1-9 scale how positive, negative,  
380 or neutral they found the images (1 = very negative to 9 = very positive, 5 = neutral). No time  
381 limit was imposed for participants to provide their ratings, and each image was shown on the  
382 screen for 4 seconds. Once all images in the set were rated, participants completed a free  
383 recall task, where they were asked to describe as many images they saw with as much detail  
384 as possible. There was no time limit imposed for the free recall.

385 At the Week 5 visit, participants first completed the same free recall task as in Week 4.  
386 Participants then viewed all 72 stimuli and for each image selected one of 3 response options:  
387 Remember, Know, and New. "Remember" was described as having a vivid memory of an image  
388 (i.e., it evoked thoughts or feelings when it was seen, recollections of something else that  
389 happened at that same moment, or where in sequence the image was). "Know" was described

390 as being confident that the image was seen but that nothing specific related to thoughts,  
391 feelings, or experience was associated with the image. “New” was described as being  
392 confident that the image was not seen before. Each image was shown on the screen for 3  
393 seconds, and there was no time limit for providing responses.

#### 394 **Sleep time**

395 Sleep and HRV derived from slow-wave sleep were measured with WHOOP wristbands<sup>34</sup>.  
396 Participants were provided WHOOP wristbands on the first day until the final week of the  
397 study. All participants were instructed to wear the wristband as close to 24 hours per day as  
398 possible. Sleep data metrics include, but are not limited to daily information of: hours in bed,  
399 hours of sleep, hours awake, hours of REM sleep, hours of deep sleep, hours of light sleep,  
400 number of disturbances, number of sleep cycles, hours of naps. Average heart rate per minute,  
401 resting heart rate, and heart rate variability were provided by WHOOP each day as well.  
402 WHOOP calculates sleep-derived HRV during the final 5 minutes of recorded deep sleep.  
403 Relative to gold standard polysomnography, WHOOP algorithms have been validated by  
404 independent researchers as having a 95% sensitivity for sleep, 68% sensitivity for deep sleep  
405 and 70% for REM sleep<sup>35</sup>.

#### 406 **MRI/MRS data acquisition**

##### 407 MRI scan session order

408 In both the pre- and post-intervention MR sessions, scans were conducted in the following  
409 order: 1) resting-state during BOLD fMRI; 2) resting-state during pCASL; 3) emotion regulation  
410 task during fMRI; 4) T<sub>1</sub>-weighted structural scan; 5) magnetic resonance spectroscopy (MRS);  
411 and 6) T<sub>1</sub>-weighted TSE scan. The post-intervention session included three additional scans,  
412 which were performed between the <sup>1</sup>H MRS and TSE scans in the following order: 1) ultimatum  
413 game task; 2) training-mimicking session during BOLD fMRI; and 3) training-mimicking session  
414 during pCASL. During both training-mimicking scans, participants engaged in their daily  
415 training without biofeedback (see below for details).

##### 416 MRI scan parameters

417 We employed a 3T Siemens MAGNETOM Trio scanner with a 32-channel head coil at the USC  
418 Dana and David Dornsife Neuroimaging Center. T<sub>1</sub>-weighted 3D structural MRI brain scans  
419 were acquired pre and post intervention using a magnetization prepared rapid acquisition  
420 gradient echo (MPRAGE) sequence with TR = 2300 ms, TE = 2.26 ms, slice thickness = 1.0 mm,  
421 flip angle = 9°, field of view = 256 mm, and voxel size = 1.0 x 1.0 x 1.0 mm<sup>3</sup>, with 175 volumes  
422 collected (4:44 min). Functional MRI scans during resting-state, emotion-regulation, training  
423 and ultimatum game tasks were acquired using multi-echo echo-planar imaging sequence with  
424 TR= 2400 ms, TE 18/35/53 ms, slice thickness = 3.0 mm, flip angle = 75°, field of view = 240  
425 mm, voxel size = 3.0 x 3.0 x 3.0 mm. We acquired 175 volumes (7:00 min) for the resting-state  
426 scan and training scan, 250 volumes (10:00 min) for the emotion-regulation task and 244  
427 volumes (9:45 min) for the ultimatum game task. PCASL scans were acquired with TR = 3880  
428 ms, TE = 36.48 ms, slice thickness = 3.0 mm, flip angle = 120°, field of view = 240 mm and voxel  
429 size = 2.5 X 2.5 X 3.0 mm<sup>3</sup>, with 12 volumes collected (3:14 min; 1st volume was an M0 image,  
430 2nd volume was a dummy image that was discarded, and the remaining 10 volumes were five

431 tag-control pairs) both during resting-state (pre and post intervention) and training-mimicking  
432 (post intervention) scans. This ASL approach provides high precision and signal-to-noise  
433 properties and has better test-retest reliability than pulsed or continuous ASL techniques<sup>36</sup>.  
434 The two-dimensional, multi-slice TSE scan was acquired with TR = 750 ms; TE = 12 ms; flip  
435 angle = 120°; bandwidth = 287 Hz/pixel; voxel size = 0.43 x 0.43 x 2.5 mm<sup>3</sup>, gap between slices  
436 = 1.0mm, 11 axial slices). The <sup>1</sup>H MRS data were acquired using a single-voxel point-resolved  
437 spectroscopy (PRESS) sequence with an echo time of 35 ms and repetition times of 2.0 s from  
438 a 4.1 cm<sup>3</sup> (1.6 x 1.6 x 1.6 cm<sup>3</sup>) voxel localized to the anterior portion of the anterior cingulate  
439 cortex. Axial, sagittal, and coronal orientations were assessed for accurate voxel placement.  
440 Metabolite spectra were acquired with water suppression (water saturation pulse with  
441 bandwidth of 50 Hz) and 128 signal averages. Additionally, 6 water reference scans were  
442 acquired. Total acquisition time, including prescans, was approximately 5 min, and all raw data  
443 were archived for processing offline.

#### 444 Pre- and post-intervention BOLD resting-state scan

445 Participants were instructed to rest, breathe normally and look at the central white cross on  
446 the screen.

#### 447 Pre- and post-intervention pCASL resting-state scan

448 To assess whether the intervention affected blood flow during rest, in both MR sessions  
449 participants completed a second short resting-state scan. Participants were instructed to rest  
450 while breathing normally with their eyes open. To make visual inputs like those viewed during  
451 the training scan (for our analyses comparing rest vs. training scans), we presented red and  
452 blue circles alternately at a random rate (see Training sessions during BOLD and pCASL section  
453 below). Participants were asked not to pay attention to these stimuli.

#### 454 Training mimicking session during BOLD and pCASL

455 In the post-intervention scan session after the resting-state and emotion-regulation scans,  
456 participants completed their daily training without biofeedback during BOLD and pCASL scans.  
457 By this point, participants were well-trained, having each completed on average 57 training  
458 sessions at home. For the Osc+ group, a red and blue circle alternated at their resonance  
459 frequency. For example, if their resonance frequency was 12 sec, the red circle was presented  
460 for 6 sec followed by the blue circle for 6 sec. Participants were asked to breathe in with the  
461 red circle and breathe out with the blue circle. For the Osc- group, the stimuli were the same  
462 as for the Osc+ group; however, the red and blue circles alternated at a random rate and  
463 participants were told not to pay attention to them. See Fig. 3 for a visual representation of  
464 training mimicking session.

#### 465 Emotion regulation task

466 Participants completed an emotion regulation task<sup>37</sup> in the MRI scanner, which lasted for  
467 about 10 min. Each trial consisted of three parts: instruction (1s), regulation (6s), and rating  
468 (4s). First, participants were given one of three instructions: “view”, “intensify,” or “diminish.”  
469 Then, during the regulation phase, they saw a positive, neutral, or negative image. Finally, they  
470 were asked to rate the strength of the feeling they were experiencing on a scale ranging from

471 1 (very weak) to 4 (very strong). See Fig. 3 for a visual representation of emotion regulation  
472 task.

#### 473 Ultimatum Game task

474 During the week 7 MRI scanning session, participants completed an Ultimatum Game (UG)  
475 task<sup>38</sup>. Before scanning, participants were instructed that in this task they would be presented  
476 by offers proposed by other participants of the study (with each player making 4 offers) or  
477 offers randomly generated by the computer. Participants had the options to accept or reject  
478 the offers. If they accepted an offer, the money would be split as proposed by the other player.  
479 If they rejected an offer, both players would receive nothing on that trial. Participants were  
480 told that at the end of the study, one of the trials in the game would be randomly selected and  
481 both them and the proposer for that trial would be paid based on the participant's response.  
482 In order to enhance realism, participants also played the role of proposer and were asked to  
483 make offers to future participants. The task lasted for about 10 minutes and consisted of 36  
484 trials. Out of these, 18 included fair and 18 included unfair offers. Fair offers ranged from 0.40  
485 to 0.55 of the endowment whereas unfair offers were defined as ones ranging from 0.05 to  
486 0.20 of the endowment. Each trial lasted 14 seconds. At the beginning of each trial, the face  
487 and initials of the proposer for that trial were presented for a duration of 2s. Then the offer  
488 proposed along with the face and initials of the proposer were shown for 5s. The decision  
489 period was then followed, during which participants had 5s to respond to the offer.  
490 Participants pressed one of two buttons on a button box to express their decision. Finally, the  
491 results screen was presented for a jittered duration of 2-6s. In between trials, a fixation cross  
492 was shown on screen which lasted between 1-4s. See Fig. 3 for a visual representation of  
493 Ultimatum Game task.

494 Younger and older adults completed two slightly different versions of the task. In younger  
495 adults' version of the task, half of the human proposers were proposers that players knew,  
496 while the other half were strangers. For familiar proposers, pictures of participants' group  
497 mates were used. In older adults' version of the task, all human proposers were strangers.

#### 498 Additional physiological measures during MRI

499 The physiological data collected during MRI scans include respiration, exhaled carbon dioxide  
500 (CO<sub>2</sub>), electrodermal activity, blood pressure, and heart rate. All the physiological data were  
501 collected at 10kHz sampling rate using Biopac MP150 Data Acquisition System with MR-  
502 compatible sensors and recorded with AcqKnowledge software 5.0. Respiration was measured  
503 using the breathing belt, TSD201 transducer and transferred to the Biopac RSP100C module  
504 to be 0.05-1Hz bandpass-filtered, amplified with 10 times of gain. Exhaled carbon dioxide  
505 (CO<sub>2</sub>) levels were measured using Philips NM3 Monitor (Model 7900) with nasal cannula and  
506 fed to Biopac MP150. The heart rate data were collected with a Nonin Medical 8600FO Pulse  
507 Oximeter and sent to Biopac MP150. The electrodermal activity was recorded using the Biopac  
508 GSR100C module. Blood pressure was measured using CareTaker device and software and  
509 recorded with Biopac MP150.

510



### Emotion regulation task

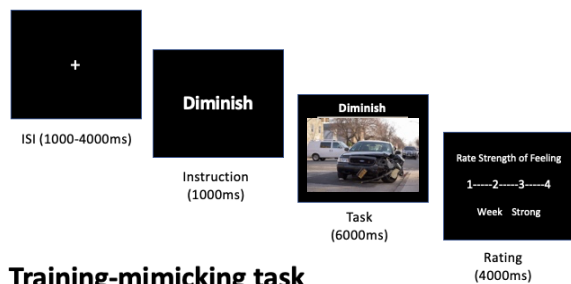

### Training-mimicking task

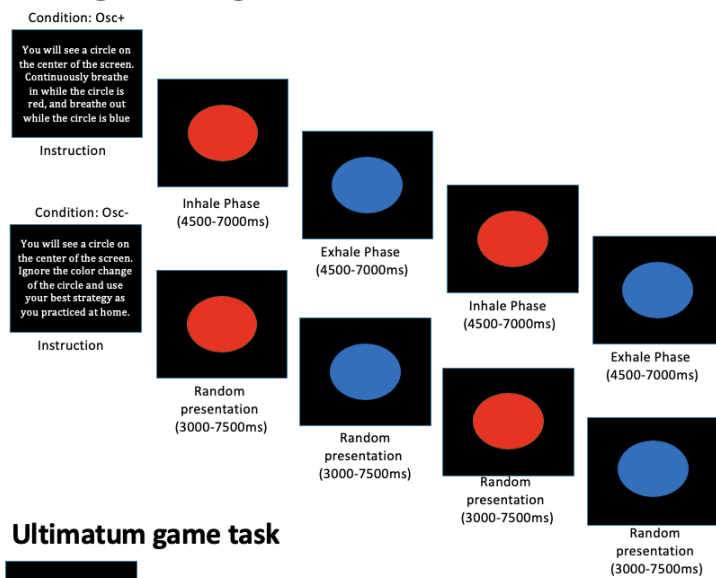

### Ultimatum game task

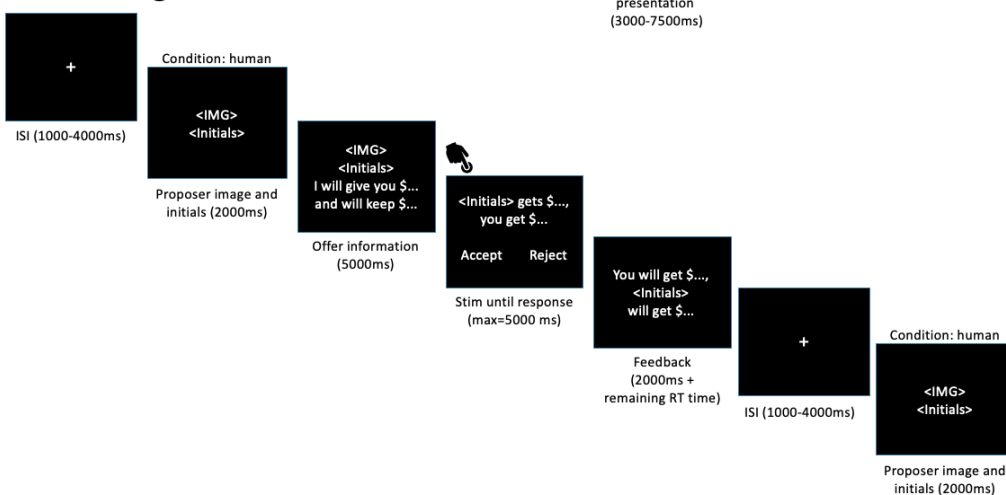

511 Fig. 3. A visual representation of all experimental paradigms during task-based fMRI. ISI:  
512 inter-stimulus interval.

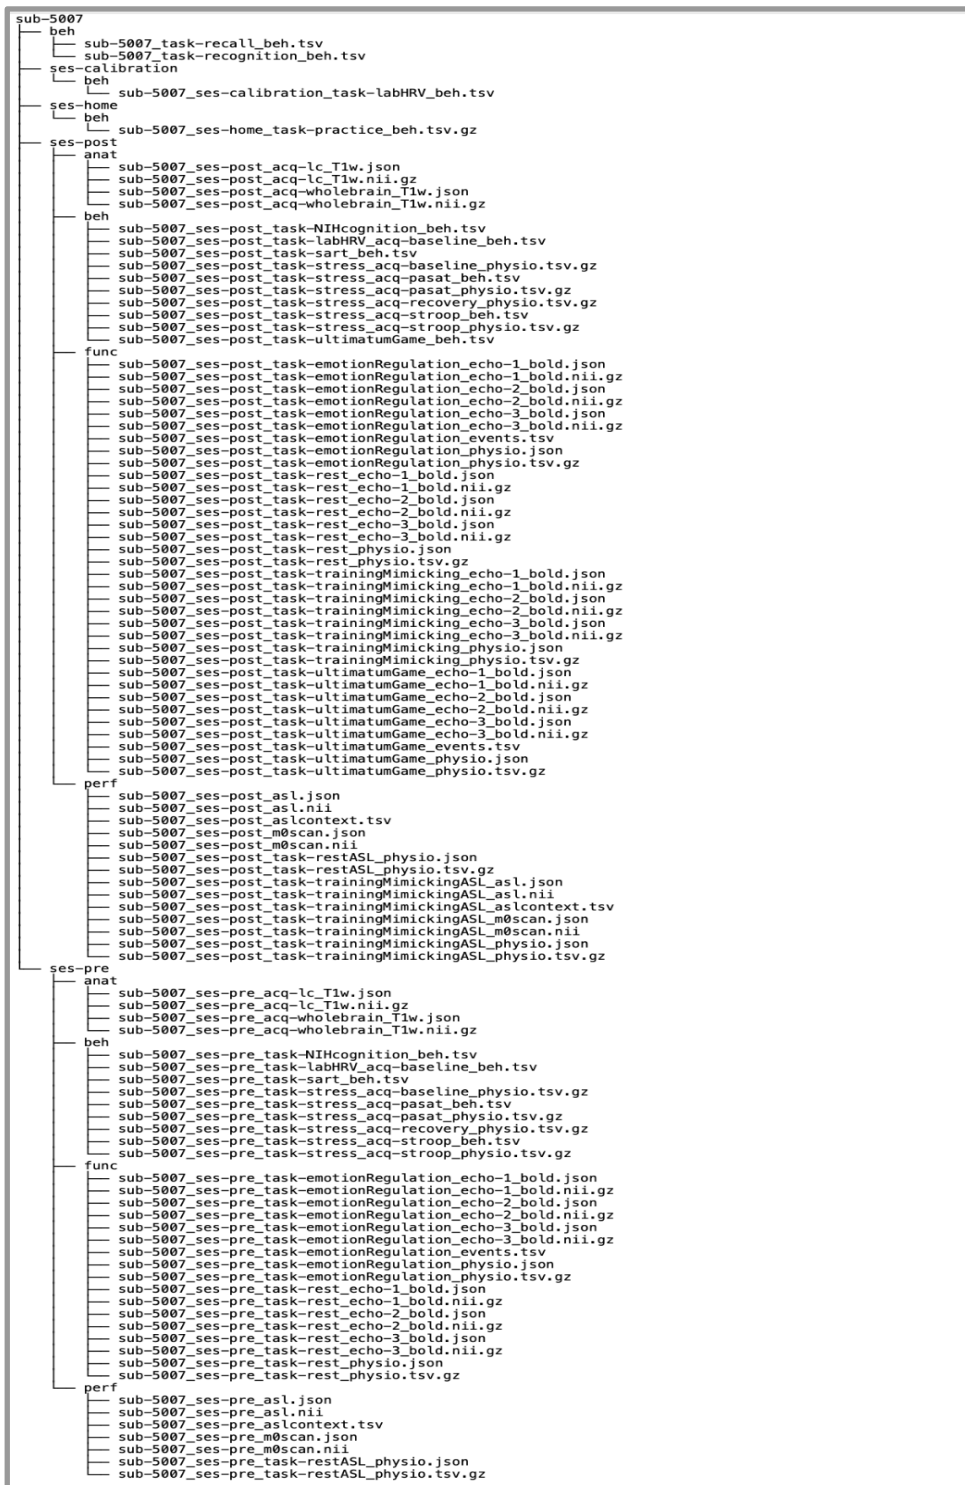

513 **Fig. 4. Example of the BIDS data structure for one participant.** The data for subject 5007 are  
 514 organized into five folders; two sessions for pre and post measurements, two sessions for HRV  
 515 biofeedback data, one for calibration and the other for home training, and one last folder for  
 516 behavioural data. While the data structure is consistent across subjects, there is some  
 517 variation regarding data availability.

## 518 **Data Records**

519 The following data are available on the OpenNeuro data sharing platform  
520 (<https://openneuro.org/datasets/ds003823>). The files were organized in Brain Imaging Data  
521 Structure (BIDS) format<sup>39</sup> (version 1.5.0; <http://bids.neuroimaging.io>). The BIDS provides a  
522 convention of fMRI data naming and organization in order to facilitate the transfer, storage,  
523 and sharing of neuroimaging data. The BIDS validation tool provided by OpenNeuro was used  
524 to ensure that the dataset followed the BIDS system.

525 At the root level of the dataset, participant demographic information, including sex, and  
526 handedness, and age group is provided in the participants.tsv file and these variables are  
527 further described in the accompanying data dictionary, participants.json. The participants.tsv  
528 file also indicates which of the different tasks, physiological data, and MRI scans are available  
529 for each participant at each time point. This information is organized into 33 columns  
530 containing “1” (data exist) or “0” (missing data) for all measures at each session (i.e., ses-  
531 pre\_task-emotionRegulation; ses-post\_task-emotionRegulation). Also, we organized the  
532 information about data quality in 15 columns containing “1” (recommend excluding) or “0”  
533 (recommend including) for MRI or physiological measures at each session.

534 We organized the rest of the participants’ data in three ways: phenotype, subject folders, and  
535 derivatives folder.

536 1) “Phenotype”: This folder includes files that list all participants’ scores on standardized tests  
537 at each time point and participants’ responses to emotion questionnaires at each time-point  
538 (with one row per participant)

539 2) “Sub- < ID >”: This folder contains participants’ MRI scan data, physiological measures, and  
540 behavioral measures. Inside the folder of each participant with data available (i.e., n = 193 for  
541 total participants and n = 162 for longitudinal data, see also Fig. 1 for detailed information),  
542 there are two subfolders, named “ses-pre”, “ses-post” that contain data collected during pre-  
543 and post-intervention sessions, respectively. Another two subfolders, named “ses-calibration”,  
544 “ses-home,” contain heart rate measures collected during in-lab calibration sessions and  
545 during home practice sessions, respectively. The last subfolder, named “beh” has individual  
546 data for the picture memory tasks, which were administered in Weeks 4 and 5.

547 Inside “ses-pre” and “ses-post” folders, there are four subfolders named “anat”, “func”, “perf”,  
548 and “beh”. “Anat” folder contains T<sub>1</sub>-weighted structural images, “func” folder contains multi-  
549 echo BOLD scan data and the physiological data collected during those scans, “perf” folder  
550 contains pCASL scan data and the physiological data collected during those scans, and “beh”  
551 folder contains behavioral and physiological measures collected outside the scanner. Inside  
552 the “func” subfolder, there are files containing participant’s performance on the task (i.e.,  
553 ‘events’ file), and physiological data for each task (i.e., ‘physio’ file) in addition to brain image  
554 files. The events file includes one row per trial, including onset time of each trial, duration of  
555 the event, trial type, response, response time, and the presented stimulus. Inside the “perf”  
556 subfolder, there are files containing (1) 10 tag & control acquisitions from the pCASL scan in a  
557 4D file (“\*\_asl.nii”) and (2) an M0 calibration image from the pCASL scan in a 3D file  
558 (“\*\_m0scan.nii”). Fig. 4 provides an example of the BIDS data structure for one subject. Table

559 2 provides detailed information about the file name and the location for each measure at each  
560 time point.

561 3) “derivatives”: This folder contains MRS, mriqc, and freesurferQC folders. Inside the MRS  
562 folder, there is a “MRS\_summary.tsv” file and individual subject folders. “MRS\_summary.tsv”  
563 includes the individual metabolite concentration levels and quality metrics for all scans for all  
564 participants. Inside each subject folder, there are two subfolders, named “ses-pre”, “ses-post”  
565 including raw MRS data as IMA file format. The pre session included one MRS scan, which  
566 produced three ‘.IMA’ files. During the post session, some participants had two MRS scans;  
567 the first MRS scan occurred at the same point in the scan sequence as the pre MRS scan. The  
568 second, optional, MRS scan was completed after all other task scans were done. Inside the  
569 mriqc folder, there are multiple files for scan types; “group\_T1w\_mriqc.tsv” and  
570 “group\_BOLD\_mriqc\_<task-name>.tsv” include the quality control metrics for the T<sub>1</sub>-weighted  
571 and functional (BOLD) MRI scans, respectively. Inside the freesurferQC folder, there is a  
572 freesurfer\_QC.tsv file including Freesurfer quality metrics and outlier participants on these  
573 metrics flagged.

574 **Table 2. Summary of data file name and location.**

| Category                          | Data type                          | Data summary file                                                                                                                             |                                                                                                                                                   | Description                                                                                                                                             |
|-----------------------------------|------------------------------------|-----------------------------------------------------------------------------------------------------------------------------------------------|---------------------------------------------------------------------------------------------------------------------------------------------------|---------------------------------------------------------------------------------------------------------------------------------------------------------|
|                                   |                                    | Individual file name for time-point1                                                                                                          | Individual file name for time-point2                                                                                                              |                                                                                                                                                         |
| Demographics                      | Demographics                       | •Participants.tsv                                                                                                                             |                                                                                                                                                   | •Participants' identification number, sex, age, handedness, and data present at each task at each time-point                                            |
| Questionnaire                     | self reported behavior and emotion | •phenotype/questionnaires_summary.tsv                                                                                                         |                                                                                                                                                   | •Summary of responses to emotion questionnaires (SAI, TAI, CESD, POMS, FFMQ, SRSI, CFQ, ERQ, PSS-10) and altruism scale                                 |
| Sleep                             | Sleep time                         | •phenotype/Whoop_Summary.tsv                                                                                                                  |                                                                                                                                                   | •Sleep and HRV derived from slow-wave sleep, measured with WHOOP wristbands.                                                                            |
| Cognitive task                    | NIH toolbox-Cognition              | •phenotype/NIH_Cognition_summary.tsv                                                                                                          |                                                                                                                                                   | •Performance on three tasks from NIH toolbox-Cognition; flanker test, list sorting working memory test, and pattern comparison processing speed test    |
|                                   |                                    | •sub-<ID>/ses-pre/beh/sub-<ID>_ses-pre_task-NIHcognition_beh.tsv                                                                              | •sub-<ID>/ses-pre/beh/sub-<ID>_ses-post_task-NIHcognition_beh.tsv                                                                                 |                                                                                                                                                         |
|                                   | SART                               | •phenotype/SART_summary.tsv                                                                                                                   |                                                                                                                                                   | •Performance on Sustained Attention to Response Task                                                                                                    |
|                                   | Memory task                        | •sub-<ID>/beh/sub-<ID>_task-recall_beh.tsv<br>•sub-<ID>/beh/sub-<ID>_task-recognition_beh.tsv                                                 |                                                                                                                                                   | •Recall and recognition on picture memory tasks at week4 and week5 lab visit                                                                            |
| HRV-biofeedback                   | calibration                        | •sub-<ID>/ses-calibration/beh/sub-<ID>_ses-calibration_task-labHRV_beh.tsv                                                                    |                                                                                                                                                   | •Heart rate data during lab calibration sessions; resting and several conditions included for each calibration session                                  |
|                                   | Home training                      | •sub-<ID>/ses-home/beh/sub-<ID>_ses-home_task-practice_beh.tsv                                                                                |                                                                                                                                                   | •Heart rate data during home practice                                                                                                                   |
| Stress task                       | Physiological data                 | •sub-<ID>/ses-pre/beh/sub-<ID>_ses-pre_task-stress_acq-baseline_physio.tsv.gz<br>•Same for acq-pasat, stroop, and recovery                    | •sub-<ID>/ses-post/beh/sub-<ID>_ses-post_task-stress_acq-baseline_physio.tsv.gz<br>•Same for acq-pasat, stroop, and recovery                      | •Physiological data (ECG, respiration, continuous blood pressure, and skin conductance response) to assess reactivity to and recovery from acute stress |
|                                   | Behavioral data                    | •sub-<ID>/ses-pre/beh/sub-<ID>_ses-pre_task-stress_acq-pasat_beh.tsv<br>•sub-<ID>/ses-pre/beh/sub-<ID>_ses-pre_task-stress_acq-stroop_beh.tsv | •sub-<ID>/ses-post/beh/sub-<ID>_ses-post_task-stress_acq-pasat_beh.tsv<br>•sub-<ID>/ses-post/beh/sub-<ID>_ses-post_task-stress_acq-stroop_beh.tsv | • Behavioral responses during PASAT and stroop task to induce acute stress                                                                              |
| MR Imaging                        | Functional-resting                 | •sub-<ID>/ses-pre/func/sub-<ID>_ses-pre_task-rest_echo-1_bold.nii.gz<br>•Same for echo-2 and echo-3                                           | •sub-<ID>/ses-post/func/sub-<ID>_ses-post_task-rest_echo-1_bold.nii.gz<br>•Same for echo-2 and echo-3                                             | •Multi-echo fMRI<br>•BOLD resting-state scan                                                                                                            |
|                                   | Functional-resting-state ASL       | •sub-<ID>/ses-pre/perf/sub-<ID>_ses-pre_asl.nii                                                                                               | •sub-<ID>/ses-post/perf/sub-<ID>_ses-post_asl.nii                                                                                                 | • pCASL resting-state scan                                                                                                                              |
|                                   | Functional-Emotion regulation      | •sub-<ID>/ses-pre/func/sub-<ID>_ses-pre_task-emotionRegulation_echo-1_bold.nii.gz<br>•Same for echo-2 and echo-3                              | •sub-<ID>/ses-post/func/sub-<ID>_ses-post_task-emotionRegulation_echo-1_bold.nii.gz<br>•Same for echo-2 and echo-3                                | •Multi-echo fMRI data<br>•Emotion regulation task during BOLD scan                                                                                      |
|                                   | Anatomical-T <sub>1</sub>          | •sub-<ID>/ses-pre/anat/sub-<ID>_ses-pre_acq-wholebrain_T1w.nii.gz                                                                             | •sub-<ID>/ses-post/anat/sub-<ID>_ses-post_acq-wholebrain_T1w.nii.gz                                                                               | •T <sub>1</sub> -weighted structural scan                                                                                                               |
|                                   | Biochemistry-MRS                   | •derivatives/MRS/MRS_summary.tsv                                                                                                              |                                                                                                                                                   | •proton magnetic resonance spectroscopy                                                                                                                 |
|                                   |                                    | •/derivatives/MRS/sub-<ID>/ses-pre/*.IMA                                                                                                      | •/derivatives/MRS/sub-<ID>/ses-post/*.IMA                                                                                                         |                                                                                                                                                         |
|                                   | Anatomical-TSE                     | •sub-<ID>/ses-pre/anat/sub-<ID>_ses-pre_acq-lc_T1w.nii.gz                                                                                     | •sub-<ID>/ses-post/anat/sub-<ID>_ses-post_acq-lc_T1w.nii.gz                                                                                       | •two-dimensional, multi-slice TSE scan                                                                                                                  |
|                                   | Functional-UG                      |                                                                                                                                               | •sub-<ID>/ses-post/func/sub-<ID>_ses-post_task-ultimatumGame_echo-1_bold.nii.gz<br>•Same for echo-2 and echo-3                                    | •Multi-echo fMRI data<br>•Ultimatum Game task during BOLD scan                                                                                          |
| Functional-training mimicking     |                                    | •sub-<ID>/ses-post/func/sub-<ID>_ses-post_task-trainingMimicking_echo-1_bold.nii.gz<br>•Same for echo-2 and echo-3                            | •Multi-echo fMRI data<br>•Training mimicking session during BOLD scan                                                                             |                                                                                                                                                         |
| Functional-training mimicking ASL |                                    | •sub-<ID>/ses-post/perf/sub-<ID>_ses-post_task-trainingMimickingASL_m0scan.nii                                                                | •Training mimicking session during pCASL scan                                                                                                     |                                                                                                                                                         |

575

## 576 **Technical Validation**

577 In this section, we describe quality control metrics for each measure. We take a conservative  
578 approach for data exclusions. We generally did not exclude brain imaging data unless (1) the  
579 MRI scan session was interrupted by unexpected events (e.g., an earthquake or power outage),  
580 (2) an absence of a usable  $T_1$ -weighted scan due to technical error or scan terminated by  
581 participants, or (3) incidental findings. Also, we did not exclude behavioral or physiological  
582 data unless (1) the task was interrupted by unexpected events (e.g., an earthquake or power  
583 outage) or (2) obvious sensor error or data input error due to a technical issue. But we applied  
584 quality control for data analyses and shared the results of quality control metrics in the  
585 derivative folder and quality control results in the participants.tsv file. This way, the future  
586 users of the datasets can use the quality-controlled data we recommend including, evaluate  
587 our quality control methods, or apply their own quality control methods on the datasets.  
588 Importantly, this places the responsibility for inclusion and exclusion of data in the hands of  
589 the users of the datasets.

### 590 **MRI Data quality assessment**

591 The quality control metrics for the  $T_1$ -weighted and functional (BOLD) MRI scans were  
592 computed by the MRIQC package, which outputs several quality control metrics as well as a  
593 report with visualizations of different aspects of the data. The quality control metrics for  $T_1$ -  
594 weighted images are stored in the group\_T1w.tsv in the derivatives/mriqc folder. The quality  
595 control metrics for the functional scans are stored in derivatives/mriqc folder.

#### 596 $T_1$ -weighted scans

597 All  $T_1$ -weighted scans were run through the MRIQC pipeline, which outputs several quality  
598 control metrics as well as a report with visualizations of different aspects of the data. All  
599 individual subject reports were visually checked for artifacts including reconstruction errors,  
600 failure of defacing, and segmentation. Defacing was considered to be successful if the 3D  
601 render did not contain more than one partial facial feature (eyes, nose, or mouth) and no brain  
602 tissue had been removed during defacing<sup>40</sup>. In Fig. 5, we visualize several quality control  
603 metrics related to the  $T_1$ -weighted scans over two time-points (pre and post). MRIQC includes  
604 the signal-to-noise ratio (SNR) calculation proposed by Dietrich et al.<sup>41</sup>, using the air  
605 background as a noise reference. Additionally, for images that have undergone some noise  
606 reduction processing, or the more complex noise realizations of current parallel acquisitions,  
607 a simplified calculation using the within tissue variance is also provided. Higher values indicate  
608 better quality. The contrast-to-noise ratio (CNR)<sup>42</sup> is an extension of the SNR calculation to  
609 evaluate how separated the tissue distributions of GM and WM are. Higher values indicate  
610 better quality. The coefficient of joint variation (CJV) of GM and WM was proposed as objective  
611 function<sup>43</sup> for the optimization of intensity non-uniformity (INU) correction algorithms. Higher  
612 values are related to the presence of heavy head motion and large INU artifacts. The entropy-  
613 focus criterion (EFC)<sup>44</sup> uses the Shannon entropy of voxel intensities as an indication of  
614 ghosting and blurring induced by head motion. Lower values are better. Median INU is an  
615 index of spatial inhomogeneity. It estimates the location and spread of the bias field  
616 extracted<sup>45</sup>. The smaller spreads located around 1.0 are better. The white matter to maximum  
617 intensity ratio (WM2MAX) is the median intensity within the WM mask over the 95%

618 percentile of the full intensity distribution, that captures the existence of long tails due to  
619 hyper-intensity of the carotid vessels and fat. Values should be around the interval [0.6, 0.8]<sup>46</sup>.  
620 In general, data quality appears consistent across time. All quality control metrics related to  
621 the T<sub>1</sub>-weighted scans for each participant, including those visualized in Fig. 5, are stored in  
622 the group\_T1w\_mriqc.tsv file in the derivatives/mriqc folder. Here we do not exclude any  
623 subjects based on IQMs, but subsequent researchers can use the available IQMs to exclude  
624 scans as they see fit.

625 Each participant's T<sub>1</sub>-weighted structural images were preprocessed using Freesurfer image  
626 analysis suite version 6.0 (<http://surfer.nmr.mgh.harvard.edu/>). Cortical reconstruction and  
627 volumetric segmentation were performed. Following initial preprocessing, we used the  
628 Freesurfer 6.0 image analysis suite longitudinal stream to automatically extract volume  
629 estimates<sup>47</sup>. After completing the longitudinal Freesurfer pipeline, we used automated  
630 measures computed by FreeSurfer of the contrast-to-noise ratio (the difference in signal  
631 intensity between regions of different tissue types and noise signal) and the Euler number (a  
632 metric of cortical surface reconstruction) to identify poor quality structural scans (Chalavi et  
633 al. 2012; Rosen et al. 2018). For analyses of volumetric change, we identified outliers (N = 4  
634 for younger adults and N = 2 for older adults) who on a box-and-whisker plot were above Q3  
635 + 3 × the interquartile range on either of these metrics on either pre or post images. Freesurfer  
636 quality metrics and the list of outliers are provided in the freesurfer\_QC.tsv file in the  
637 derivatives/freesurferQC folder.

638

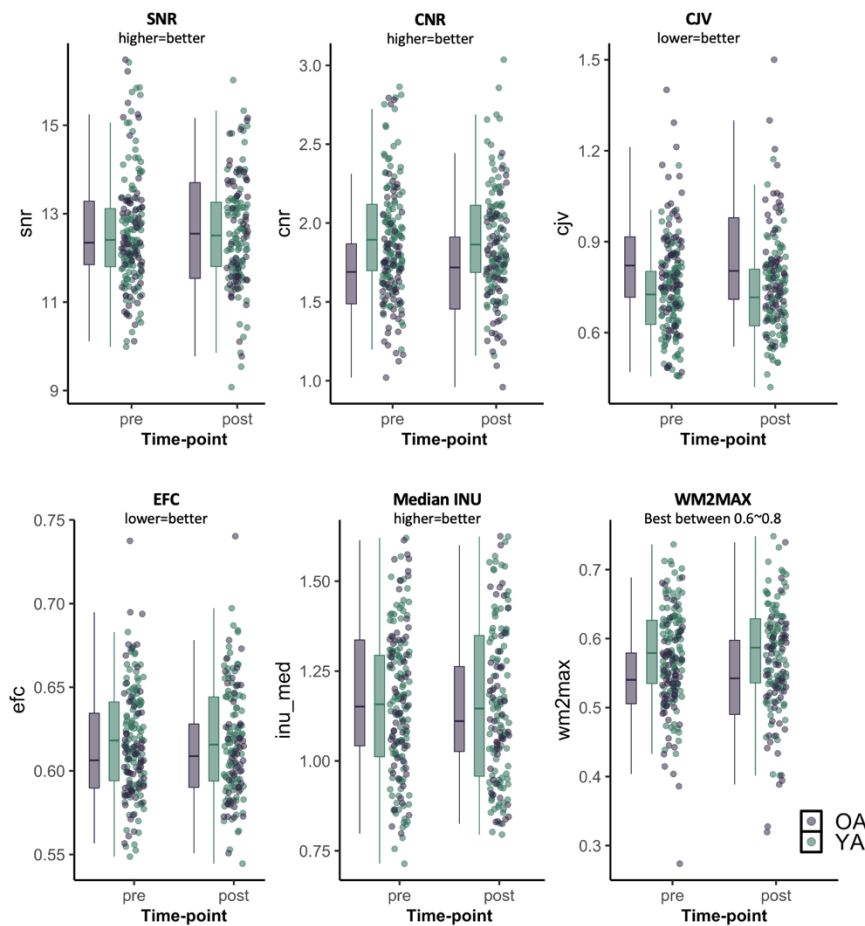

639 **Fig. 5. Quality control metrics related to the T<sub>1</sub>-weighted scans at each time-point. Quality**  
 640 **control metrics related to the T<sub>1</sub>-weighted scans.** SNR: signal-to-noise ratio; CNR: contrast-to-  
 641 noise ratio; CJV: coefficient of joint variation, an index reflecting head motion and spatial  
 642 inhomogeneity; EFC: entropy-focused criterion, an index reflecting head motion and ghosting;  
 643 Median INU: intensity non-uniformity, an index of spatial inhomogeneity; WM2MAX: ratio of  
 644 median white-matter intensity to the 95% percentile of all signal intensities

645 Functional (BOLD) scans

646 The functional (BOLD) scans were run through the MRIQC pipeline. The resulting reports were  
 647 visually checked for artifacts including reconstruction errors, registration issues, and incorrect  
 648 brain masks. In Fig. 6, we visualize several quality control metrics related to the functional  
 649 scans across three echo times (e1 = 18ms, e2 = 35, and e3 = 53 ms) over two time-points (pre  
 650 and post). Temporal SNR (tSNR) is a simplified interpretation of the tSNR definition<sup>48</sup>. The  
 651 MRIQC pipeline provided the median value of the tSNR map calculated as,  $tSNR = \langle S \rangle_t / \sigma_t$ ,  
 652 where  $\langle S \rangle_t$  is the average BOLD signal (across time), and  $\sigma_t$  is the corresponding temporal  
 653 standard-deviation map. Higher values are better when comparing scans at the same echo  
 654 (differences across echo times are expected due to effects of echo time on BOLD contrast).  
 655 Mean Framewise Displacement (FD) is a measure of subject head motion, which compares the  
 656 motion between the current and previous volumes. Higher values indicate lower quality.



657 Global Correlation (GCOR) is the average correlation of all pairs of voxel time series inside of  
 658 the brain. GCOR measures differences between data due to motion/physiological  
 659 noise/imaging artifacts as well as global neural fluctuations<sup>49,50</sup>. MRIQC measures ghost-to-  
 660 signal ratio (GSR) along the x or y encoding axes. Higher values indicate lower quality. Like the  
 661 T<sub>1</sub>-weighted quality control metrics, the functional quality metrics appear consistent across  
 662 time. All quality control metrics related to the functional (BOLD) scans for each participant,  
 663 including those visualized in Fig. 6, are provided in the group\_BOLD\_mriqc.tsv file in the  
 664 derivatives/mriqc folder. Here we do not exclude any subjects based on IQMs, but subsequent  
 665 researchers can use the available IQMs to exclude scans as they see fit.

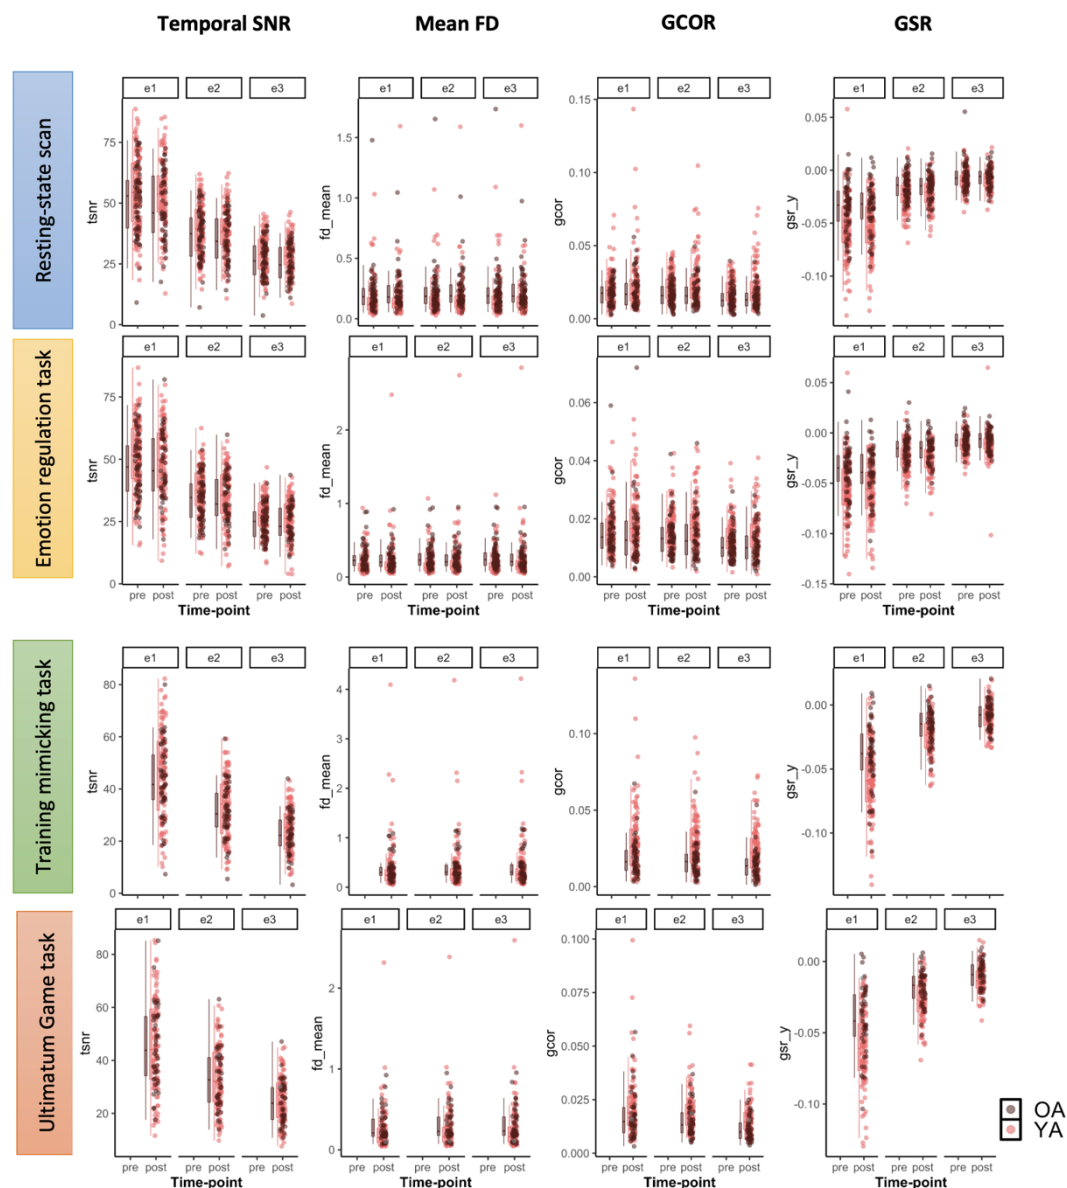

666 **Fig. 6. Quality control metrics related to the multi-echo functional (BOLD) scans at each time-**  
 667 **point for resting-state scan, emotion regulation task scan, training mimicking task scan, and**  
 668 **UG task.** SNR: signal-to-noise ratio, an index of signal quality; FD: framewise displacement, an  
 669 index of overall movement; GCOR: global correlation, an index of the presence of global signals;  
 670 GSR: ghost-to-signal ratio, an index of ghosting along the phase-encoding axis.

## 671 MRS scans

672 Post-processing and quantification of the  $^1\text{H}$ MRS data were 100% automated<sup>51</sup>. For each  $^1\text{H}$   
673 MRS spectra, the metabolites N-acetyl-aspartate (NAA), phosphocreatine plus creatine  
674 (PCr+Cr), trimethylamines [glycerophosphocholine plus phosphocholine (GP+CPC)], and myo-  
675 inositol, glutamate, and glutamine (as well as the less reliable metabolites, aspartate, gamma-  
676 aminobutyric acid, glutathione, lactate, n-acetylaspartylglutamate, scyllo-inositol and taurine)  
677 were quantified using the Linear Combination (LC) Model software<sup>52</sup> with a simulated basis set  
678 for the a priori knowledge reflecting the acquisition parameters. An example of an individual  
679 MRS spectrum from the  $^1\text{H}$  MRS voxel placed in the anterior cingulate cortex is shown in Fig.  
680 7. Freesurfer and FSL tools (FLIRT, FAST, MRI\_VOLSYNTH, MRI\_VOL2VOL) were used to tissue  
681 segment the  $T_1$ -weighted images, which were then used to quantify the tissue fraction values  
682 within each voxel location.

683

684 As quality control metrics for the MRS scans, we used SNR, line width reflecting the full width  
685 at half maximum (FWHM) of NAA, and Cramér-Rao lower bound (CRLB)<sup>53</sup>. Nine MRS spectra  
686 were rejected for poor quality (pre: 3, post-1st: 3, post-2nd: 3) due to extreme CRLB values  
687 and the distribution of quality metrics are visualized in Fig. 8 after removal of poor quality data.  
688 Also, all metabolite levels that have CRLB higher than 25% or another chosen threshold are  
689 tagged “outlier” with gray color in Fig. 8. But we included all data with quality tag in the shared  
690 data file, “MRS\_summary.tsv”, for future users of the datasets to apply their own threshold  
691 on the datasets<sup>54</sup>. The individual metabolite levels and quality metrics are provided for all  
692 scans for all participants in the MRS\_summary.tsv file in the derivatives/MRS folder.

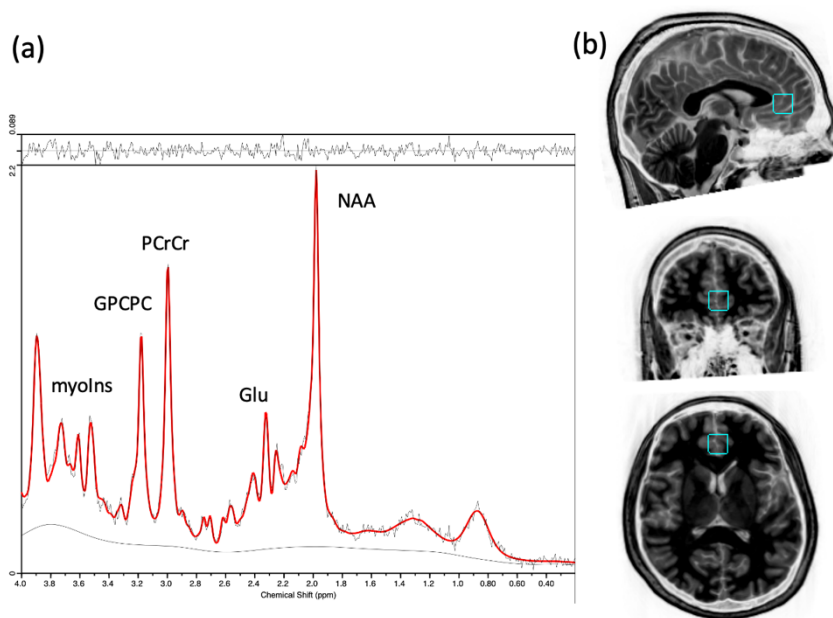

693 **Fig. 7. An example of an individual quantified MRS spectrum (a) and the sagittal, coronal and**  
694 **axial view of the MRS voxel placed in the anterior cingulate cortex, from top to bottom (b).**

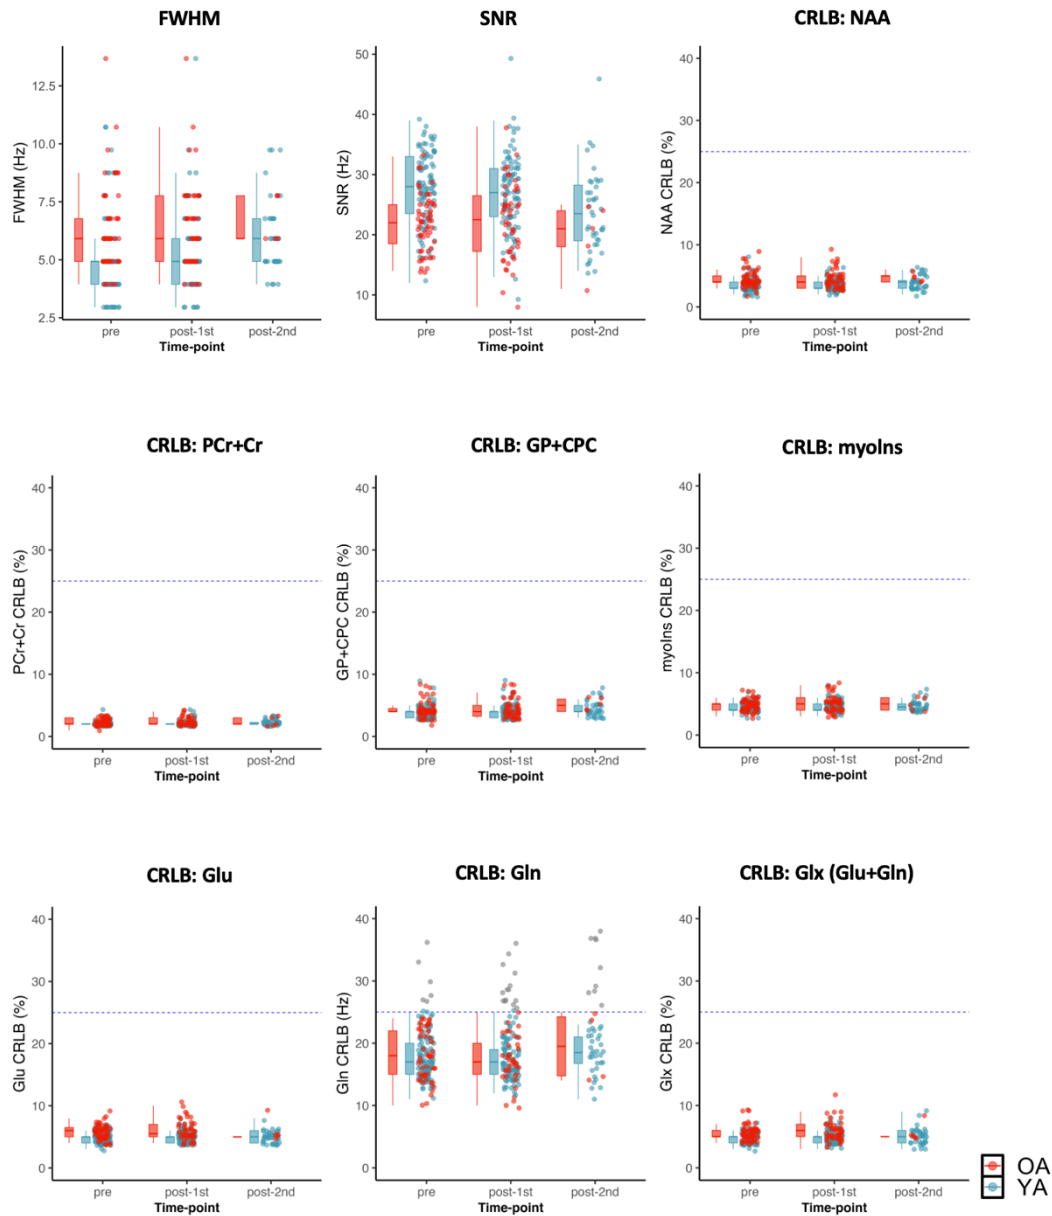

695 **Fig. 8. Quality control metrics related to the MRS scans at each time-point.** 9 out of 353  
 696 spectra were rejected as bad quality and not included in the figure. CRLB >25% are detected  
 697 as outliers specified by gray color. FWHM: full width at half maximum of singlet peaks; SNR:  
 698 signal to noise ratio; CRLB: Cramér-Rao lower bound; NAA:N-acetyl-aspartate; PCr+Cr:  
 699 phosphocreatine plus creatine ; GP+CPC: glycerophosphocholine plus phosphocholine;  
 700 myoIns: myo-inositol; Glu: glutamate; Gln: glutamine; Glu\_Gln: Glu + Gln.

701 **Resting heart rate data quality assessment**

702 The resting heart rate data was measured during weekly HRV calibration sessions. The pulse  
703 was measured with an infrared pulse plethysmograph (ppg) ear sensor and the interbeat  
704 interval (IBI) data was extracted after eliminating ectopic beats or other sources of artifacts  
705 through a built-in process in emWave pro software. Fig. 9 depicts distributions of the artifact  
706 correction rate, mean heart rate, and RMSSD.

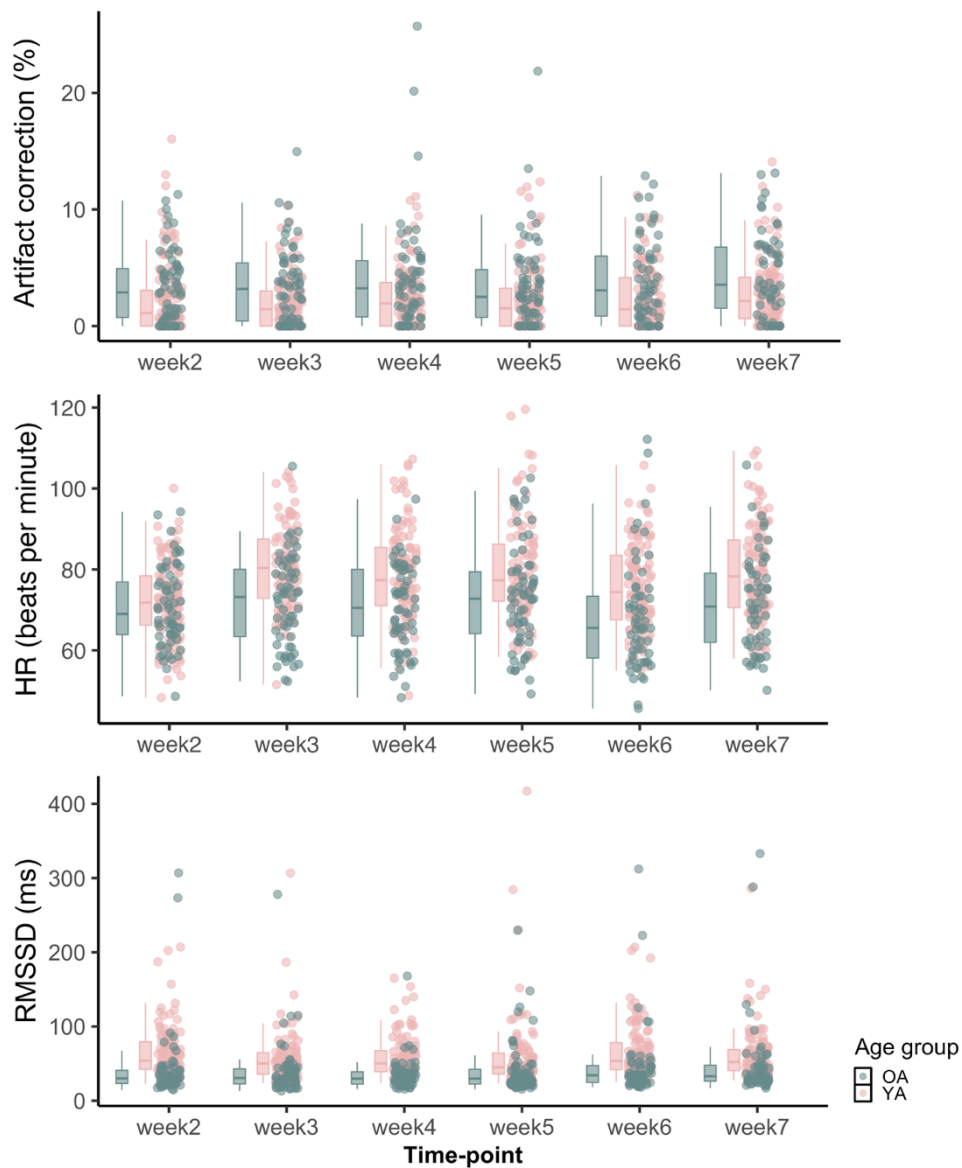

707 **Fig. 9. Distribution of artifact correction (%), heart rate (HR), and RMSSD during rest from**  
708 **weekly lab calibration session.**

709 **Behavioral measure quality assessment**

710 We calculated descriptive statistics and reliability estimates of each subscale of the emotion  
711 questionnaire (Table 3). We reported average Cronbach’s alpha coefficients from multiple  
712 time-points to ensure their internal consistency. To check the test-retest reliability, we  
713 reported the intraclass correlation coefficients and typical percentage error<sup>55</sup>.

714 **Table 3. Summary of internal consistency (Cronbach’s alpha) and test-retest reliability**  
715 **estimates in emotion questionnaire.**

|   | Abbr.  | Full Name                                               | Reference                  | No. of Items | Construct                          | M (SD)        | Cronbach’s alpha    | Intraclass correlation coefficient | Typical percentage error (%) |
|---|--------|---------------------------------------------------------|----------------------------|--------------|------------------------------------|---------------|---------------------|------------------------------------|------------------------------|
| 1 | POMS   | The profile of mood states                              | Grove & Prapavessis (1992) | 40           | Total Mood Disturbance             | 88.46 (14.4)  | 0.88 (0.85 - 0.91)  | 0.67                               | 11.02                        |
| 2 | SAI    | The state anxiety inventory                             | Spielberger et al.(1983)   | 20           | State anxiety                      | 36.33 (9.36)  | 0.72 (0.59 - 0.77)  | 0.70                               | 15.92                        |
| 3 | TAI    | The trait anxiety inventory                             | Spielberger et al.(1983)   | 20           | Trait anxiety                      | 38.46 (10.04) | 0.55 (0.46 - 0.61)  | 0.71                               | 14.86                        |
| 4 | CESD   | The Center for Epidemiological Studies Depression Scale | Radloff (1977)             | 20           | Depression                         | 12.44 (7.74)  | 0.71 (0.67 - 0.74)  | 0.71                               | 37.33                        |
| 5 | FFMQ   | The Five Facet Mindfulness Questionnaire                | Tran et al. (2013)         | 20           | Mindfulness                        | 67.98 (10.33) | 0.65 (0.60 - 0.70)  | 0.82                               | 6.64                         |
| 6 | SRS13  | The Smith Relaxation States Inventory 3-I               | Smith (2001)               | 38 (26)      | Relaxation (state)                 | 3.11 (0.84)   | 0.94 (0.93 - 0.95)  | 0.71                               | 15.41                        |
|   |        |                                                         |                            | 38 (8)       | Stress (state)                     | 1.81 (0.64)   | 0.83 (0.82- 0.83)   | 0.56                               | 26.16                        |
|   |        | The Smith Relaxation States Inventory 3-II              |                            | 38 (26)      | Relaxation (frequency)             | 3.78 (0.85)   | 0.93 (0.927- 0.932) | 0.66                               | 13.83                        |
|   |        |                                                         |                            | 38 (8)       | Stress (frequency)                 | 3.1 (0.96)    | 0.82 (0.818- 0.826) | 0.72                               | 17.33                        |
| 7 | CFQ 11 | The Chalder Fatigue Scale                               | Jackson (2015)             | 11           | Fatigue                            | 12.48 (4.46)  | 0.86 (0.85 - 0.87)  | 0.56                               | 25.53                        |
| 8 | ERQ    | The Emotion Regulation Questionnaire                    | Gross & John (2003)        | 10           | Emotion regulation (frequency)     | 45.40 (7.24)  | 0.75 (0.74 - 0.76)  | 0.67                               | 10.15                        |
|   |        |                                                         |                            | 10           | Emotion regulation (self-efficacy) | 49.92 (8.96)  | 0.88 (0.86 - 0.90)  | 0.55                               | 13.52                        |
| 9 | PSS-10 | Perceived stress scale                                  | Cohen et al., (1983)       | 10           | Perceived stress                   | 2.65 (0.59)   | 0.86 (0.84 - 0.89)  | 0.61                               | 14.61                        |

716

717 **Physiological measure quality assessment**

718 Table 4 summarizes the main characteristics of physiological data collected during 7-minute  
719 resting-state BOLD MRI scans over two time-points. The original data files during MRI scans  
720 were stored using the Biopac AcqKnowledge software and later converted as a tsv file for  
721 sharing.

722 **Table 4. Descriptive statistics and test-retest correlation of physiological measures during**  
723 **resting scan.**

| Age group              | Condition              |      | Respiration rate (Hz)     |                           | Heart rate (bpm)          |                           | ETCO <sub>2</sub> (mmHg)  |                           |       |
|------------------------|------------------------|------|---------------------------|---------------------------|---------------------------|---------------------------|---------------------------|---------------------------|-------|
|                        |                        |      | week 2                    | week 7                    | week 2                    | week 7                    | week 2                    | week 7                    |       |
| YA                     | Osc+                   | M    | 0.27                      | 0.25                      | 68.90                     | 66.14                     | 41.00                     | 40.44                     |       |
|                        |                        | SD   | 0.06                      | 0.07                      | 9.65                      | 8.69                      | 3.13                      | 3.27                      |       |
|                        |                        | N    | 54                        | 46                        | 59                        | 45                        | 35                        | 41                        |       |
|                        | Osc-                   | M    | 0.29                      | 0.29                      | 69.79                     | 67.97                     | 40.56                     | 40.76                     |       |
|                        |                        | SD   | 0.06                      | 0.06                      | 10.33                     | 9.65                      | 4.02                      | 3.99                      |       |
|                        |                        | N    | 43                        | 41                        | 51                        | 43                        | 31                        | 37                        |       |
|                        | Week 2 & 7 correlation |      |                           | $r(68) = 0.69, p < 0.001$ |                           | $r(80) = 0.53, p < 0.001$ |                           | $r(44) = 0.50, p < 0.001$ |       |
|                        | OA                     | Osc+ | M                         | 0.23                      | 0.22                      | 65.87                     | 62.11                     | 39.97                     | 40.11 |
|                        |                        |      | SD                        | 0.07                      | 0.06                      | 9.55                      | 10.95                     | 4.78                      | 4.42  |
| N                      |                        |      | 28                        | 25                        | 29                        | 25                        | 28                        | 24                        |       |
| Osc-                   |                        | M    | 0.22                      | 0.23                      | 70.35                     | 69.34                     | 41.07                     | 41.65                     |       |
|                        |                        | SD   | 0.06                      | 0.06                      | 11.78                     | 13.59                     | 4.04                      | 4.30                      |       |
|                        |                        | N    | 24                        | 24                        | 27                        | 21                        | 25                        | 25                        |       |
| Week 2 & 7 correlation |                        |      | $r(40) = 0.81, p < 0.001$ |                           | $r(41) = 0.89, p < 0.001$ |                           | $r(42) = 0.80, p < 0.001$ |                           |       |

724

## 725 **Code Availability**

726 All code for collecting, formatting, and processing the data is available at  
727 [https://github.com/EmotionCognitionLab/HRV-ER-dataset\\_release](https://github.com/EmotionCognitionLab/HRV-ER-dataset_release). Information about the  
728 code dependencies and package requirements are available in the same Github repository.

729

## 730 **Acknowledgements**

731 This study was supported by NIH R01AG057184 (PI Mather). We thank study participants for  
732 their contribution. We thank the research assistant team for their help with data collection:  
733 Michelle Wong, Kathryn Cassutt, Collin Amano, Heekyung Rachael Kim, Seungyeon Lee,  
734 Alexandra Haydinger, Lauren Thompson, Gabriel Shih, Divya Suri, Sophia Ling, Akanksha Jain,  
735 Linette Bagtas, Sumedha Attanti, Ivy Hsu, Michael Kwan, and Juliana Lee.

736

## 737 **Author contributions**

738 The authors made the following contributions. HY: Conceptualization, Data curation, Formal  
739 analysis, Investigation, Methodology, Software, Validation, Visualization, Writing - original  
740 draft; KN: Conceptualization, Data curation, Investigation, Writing - review & editing, Project  
741 administration; JM: Conceptualization, Data curation, Investigation; CCho: Conceptualization,  
742 Data curation, Investigation, Resources, Project administration; NM: Data curation, Software,  
743 Validation; SB, PN, & SP: Conceptualization, Data curation, Investigation, Writing - review &  
744 editing; SD: Investigation, Writing - review & editing; PC, YZ, & VG: Data curation, Investigation;  
745 TF: Data curation, Software; JFT, PL, CChang, VM, SN, & DN: Conceptualization, Writing -  
746 review & editing; JS: Data curation, Formal analysis, & Writing; JW: Conceptualization & Data  
747 curation; MM: Conceptualization, Funding acquisition, Resources, Project administration,  
748 Supervision, Writing - review & editing.

749

## 750 **Competing interests**

751 The authors have no relevant financial or non-financial interests to disclose.

## 752 References

753

- 754 1 Beauchaine, T. P. & Thayer, J. F. Heart rate variability as a transdiagnostic biomarker  
755 of psychopathology. *Int J Psychophysiol* **98**, 338-350,  
756 doi:10.1016/j.ijpsycho.2015.08.004 (2015).
- 757 2 Ge, F., Yuan, M., Li, Y. & Zhang, W. Posttraumatic stress disorder and alterations in  
758 resting heart rate variability: A systematic review and meta-analysis. *Psychiatry*  
759 *investigation* **17**, 9, doi:10.30773/pi.2019.0112 (2020).
- 760 3 Kemp, A. H. *et al.* Impact of depression and antidepressant treatment on heart rate  
761 variability: a review and meta-analysis. *Biological psychiatry* **67**, 1067-1074,  
762 doi:10.1016/j.biopsych.2009.12.012 (2010).
- 763 4 Sclocco, R. *et al.* The influence of respiration on brainstem and cardiovagal response  
764 to auricular vagus nerve stimulation: a multimodal ultrahigh-field (7T) fMRI study.  
765 *Brain stimulation* **12**, 911-921, doi:10.1016/j.brs.2019.02.003 (2019).
- 766 5 Goessel, V., Curtiss, J. & Hofmann, S. The effect of heart rate variability biofeedback  
767 training on stress and anxiety: a meta-analysis. *Psychological Medicine* **47**, 1-9,  
768 doi:10.1017/S0033291717001003 (2017).
- 769 6 Lehrer, P. *et al.* Heart Rate Variability Biofeedback Improves Emotional and Physical  
770 Health and Performance: A Systematic Review and Meta Analysis. *Appl*  
771 *Psychophysiol Biofeedback* **45**, 109-129, doi:10.1007/s10484-020-09466-z (2020).
- 772 7 Mather, M. & Thayer, J. How heart rate variability affects emotion regulation brain  
773 networks. *Curr Opin Behav Sci* **19**, 98-104, doi:10.1016/j.cobeha.2017.12.017 (2018).
- 774 8 HeartMath®Institute. emWavePro. (2020).
- 775 9 Lehrer, P. *et al.* Protocol for heart rate variability biofeedback training. *Biofeedback*  
776 **41**, 98-109 (2013).
- 777 10 Tarvainen, M. P., Niskanen, J. P., Lipponen, J. A., Ranta-Aho, P. O. & Karjalainen, P. A.  
778 Kubios HRV--heart rate variability analysis software. *Comput Methods Programs*  
779 *Biomed* **113**, 210-220, doi:10.1016/j.cmpb.2013.07.024 (2014).
- 780 11 Feng, T. Biofeedback to decrease HRV. (2018).
- 781 12 Grove, J. R. & Prapavessis, H. Preliminary Evidence for the Reliability and Validity of  
782 an Abbreviated Profile of Mood States. *International Journal of Sport Psychology* **23**,  
783 93-109 (1992).
- 784 13 Spielberger, C. D. State-trait anxiety inventory for adults. (1983).
- 785 14 Radloff, L. S. The CES-D scale: A self-report depression scale for research in the  
786 general population. *Applied psychological measurement* **1**, 385-401 (1977).
- 787 15 Tran, U. S., Glück, T. M. & Nader, I. W. Investigating the Five Facet Mindfulness  
788 Questionnaire (FFMQ): Construction of a short form and evidence of a two-factor  
789 higher order structure of mindfulness. *Journal of Clinical Psychology* **69**, 951-965,  
790 doi:10.1002/jclp.21996 (2013).
- 791 16 Smith, J. C. *Advances in ABC relaxation: Applications and inventories*. (Springer  
792 Publishing Company, 2001).
- 793 17 Smith, J. C. RMM Tracker/SRSI3 MANUAL v9. 15.2020 Jonathan C. Smith, PhD.
- 794 18 Jackson, C. The Chalder fatigue scale (CFQ 11). *Occupational medicine* **65**, 86-86,  
795 doi:10.1093/occmed/kqu168 (2015).
- 796 19 Gross, J. J. & John, O. P. Individual differences in two emotion regulation processes:  
797 implications for affect, relationships, and well-being. *Journal of personality and social*  
798 *psychology* **85**, 348, doi:10.1037/0022-3514.85.2.348 (2003).
- 799 20 Kupst, M. J. *et al.* Assessment of stress and self-efficacy for the NIH Toolbox for  
800 Neurological and Behavioral Function. *Anxiety, Stress, & Coping* **28**, 531-544,  
801 doi:10.1080/10615806.2014.994204 (2015).



- 802 21 Cohen, S., Kamarck, T. & Mermelstein, R. A global measure of perceived stress.  
803 *Journal of health and social behavior* **24**, 385-396 (1983).
- 804 22 Rushton, J. P., Chrisjohn, R. D. & Fekken, G. C. The altruistic personality and the self-  
805 report altruism scale. *Personality and individual differences* **2**, 293-302 (1981).
- 806 23 Dickerson, S. S. & Kemeny, M. E. Acute stressors and cortisol responses: a theoretical  
807 integration and synthesis of laboratory research. *Psychological bulletin* **130**, 355,  
808 doi:10.1037/0033-2909.130.3.355 (2004).
- 809 24 Tombaugh, T. N. A comprehensive review of the paced auditory serial addition test  
810 (PASAT). *Archives of clinical neuropsychology* **21**, 53-76,  
811 doi:10.1016/j.acn.2005.07.006 (2006).
- 812 25 MacLeod, C. M. Half a century of research on the Stroop effect: an integrative  
813 review. *Psychological bulletin* **109**, 163, doi:10.1037/0033-2909.109.2.163 (1991).
- 814 26 Weintraub, S. *et al.* Cognition assessment using the NIH Toolbox. *Neurology* **80**, S54-  
815 S64 (2013).
- 816 27 Gershon, R. C. *et al.* NIH toolbox for assessment of neurological and behavioral  
817 function. *Neurology* **80**, S2-S6, doi:10.1212/WNL.0b013e3182872e5f (2013).
- 818 28 Rueda, M. R. *et al.* Development of attentional networks in childhood.  
819 *Neuropsychologia* **42**, 1029-1040, doi:10.1016/j.neuropsychologia.2003.12.012  
820 (2004).
- 821 29 Mungas, D., Reed, B. R., Farias, S. T. & Decarli, C. Criterion-referenced validity of a  
822 neuropsychological test battery: equivalent performance in elderly Hispanics and  
823 non-Hispanic Whites. *Journal of the International Neuropsychological Society* **11**,  
824 620-630, doi:10.1017/S1355617705050745 (2005).
- 825 30 Crane, P. K. *et al.* Item response theory facilitated cocalibrating cognitive tests and  
826 reduced bias in estimated rates of decline. *Journal of clinical epidemiology* **61**, 1018-  
827 1027. e1019, doi:10.1016/j.jclinepi.2007.11.011 (2008).
- 828 31 Salthouse, T. A., Babcock, R. L. & Shaw, R. J. Effects of adult age on structural and  
829 operational capacities in working memory. *Psychology and aging* **6**, 118,  
830 doi:10.1037//0882-7974.6.1.118 (1991).
- 831 32 Robertson, I. H., Manly, T., Andrade, J., Baddeley, B. T. & Yiend, J. Oops!':  
832 performance correlates of everyday attentional failures in traumatic brain injured  
833 and normal subjects. *Neuropsychologia* **35**, 747-758 (1997).
- 834 33 Marchewka, A., Żurawski, Ł., Jednoróg, K. & Grabowska, A. The Nencki Affective  
835 Picture System (NAPS): Introduction to a novel, standardized, wide-range, high-  
836 quality, realistic picture database. *Behavior research methods* **46**, 596-610,  
837 doi:10.3758/s13428-013-0379-1 (2014).
- 838 34 Bellenger, C. R., Miller, D., Halson, S. L., Roach, G. & Sargent, C. Wrist-based  
839 photoplethysmography assessment of heart rate and heart rate variability:  
840 Validation of WHOOP. *Sensors* **21**, 3571, doi:10.3390/s21103571 (2021).
- 841 35 Miller, D. J. *et al.* A Validation Study of a Commercial Wearable Device to  
842 Automatically Detect and Estimate Sleep. *Biosensors* **11**, 185,  
843 doi:10.3390/bios11060185 (2021).
- 844 36 Chen, Y., Wang, D. J. & Detre, J. A. Test–retest reliability of arterial spin labeling with  
845 common labeling strategies. *Journal of Magnetic Resonance Imaging* **33**, 940-949,  
846 doi:10.1002/jmri.22345 (2011).
- 847 37 Kim, S. H. & Hamann, S. Neural correlates of positive and negative emotion  
848 regulation. *Journal of cognitive neuroscience* **19**, 776-798,  
849 doi:10.1162/jocn.2007.19.5.776 (2007).
- 850 38 Sanfey, A. G., Rilling, J. K., Aronson, J. A., Nystrom, L. E. & Cohen, J. D. The neural  
851 basis of economic decision-making in the ultimatum game. *Science* **300**, 1755-1758,  
852 doi:10.1126/science.1082976 (2003).

- 853 39 Gorgolewski, K. J. *et al.* The brain imaging data structure, a format for organizing and  
854 describing outputs of neuroimaging experiments. *Sci Data* **3**, 160044,  
855 doi:10.1038/sdata.2016.44 (2016).
- 856 40 Theyers, A. E. *et al.* Multisite Comparison of MRI Defacing Software Across Multiple  
857 Cohorts. *Frontiers in psychiatry* **12**, 189, doi:10.3389/fpsy.2021.617997 (2021).
- 858 41 Dietrich, O., Raya, J. G., Reeder, S. B., Reiser, M. F. & Schoenberg, S. O. Measurement  
859 of signal-to-noise ratios in MR images: influence of multichannel coils, parallel  
860 imaging, and reconstruction filters. *Journal of Magnetic Resonance Imaging: An  
861 Official Journal of the International Society for Magnetic Resonance in Medicine* **26**,  
862 375-385, doi:10.1002/jmri.20969 (2007).
- 863 42 Magnotta, V. A. & Friedman, L. Measurement of signal-to-noise and contrast-to-  
864 noise in the fBIRN multicenter imaging study. *Journal of digital imaging* **19**, 140-147,  
865 doi:10.1007/s10278-006-0264-x (2006).
- 866 43 Ganzetti, M., Wenderoth, N. & Mantini, D. Intensity Inhomogeneity Correction of  
867 Structural MR Images: A Data-Driven Approach to Define Input Algorithm  
868 Parameters. *Frontiers in Neuroinformatics* **10**, 10, doi:10.3389/fninf.2016.00010  
869 (2016).
- 870 44 Atkinson, D., Hill, D. L., Stoye, P. N., Summers, P. E. & Keevil, S. F. Automatic  
871 correction of motion artifacts in magnetic resonance images using an entropy focus  
872 criterion. *IEEE Transactions on Medical imaging* **16**, 903-910 (1997).
- 873 45 Esteban, O. *et al.* Crowdsourced MRI quality metrics and expert quality annotations  
874 for training of humans and machines. *Scientific data* **6**, 1-7, doi:10.1038/s41597-019-  
875 0035-4 (2019).
- 876 46 Esteban, O. *et al.* MRIQC: Advancing the automatic prediction of image quality in  
877 MRI from unseen sites. *PloS one* **12**, e0184661, doi:10.1371/journal.pone.0184661  
878 (2017).
- 879 47 Reuter, M., Schmansky, N. J., Rosas, H. D. & Fischl, B. Within-subject template  
880 estimation for unbiased longitudinal image analysis. *Neuroimage* **61**, 1402-1418,  
881 doi:10.1016/j.neuroimage.2012.02.084 (2012).
- 882 48 Krüger, G. & Glover, G. H. Physiological noise in oxygenation-sensitive magnetic  
883 resonance imaging. *Magnetic Resonance in Medicine: An Official Journal of the  
884 International Society for Magnetic Resonance in Medicine* **46**, 631-637,  
885 doi:10.1002/mrm.1240 (2001).
- 886 49 Saad, Z. S. *et al.* Correcting brain-wide correlation differences in resting-state fMRI.  
887 *Brain connectivity* **3**, 339-352 (2013).
- 888 50 Schölvinck, M. L., Maier, A., Ye, F. Q., Duyn, J. H. & Leopold, D. A. Neural basis of  
889 global resting-state fMRI activity. *Proceedings of the National Academy of Sciences*  
890 **107**, 10238-10243 (2010).
- 891 51 Stanley, J. A. *et al.* Functional dynamics of hippocampal glutamate during associative  
892 learning assessed with in vivo 1H functional magnetic resonance spectroscopy.  
893 *Neuroimage* **153**, 189-197 (2017).
- 894 52 Provencher, S. W. Estimation of metabolite concentrations from localized in vivo  
895 proton NMR spectra. *Magnetic resonance in medicine* **30**, 672-679 (1993).
- 896 53 Sanaei Nezhad, F. *et al.* Quantification of GABA, glutamate and glutamine in a single  
897 measurement at 3 T using GABA-edited MEGA-PRESS. *NMR in Biomedicine* **31**, e3847  
898 (2018).
- 899 54 Kreis, R. The trouble with quality filtering based on relative Cramér-Rao lower  
900 bounds. *Magnetic resonance in medicine* **75**, 15-18 (2016).
- 901 55 Hopkins, W. G. Measures of reliability in sports medicine and science. *Sports  
902 medicine* **30**, 1-15, doi:10.2165/00007256-200030010-00001 (2000).
- 903
